1                    **EB3-informed dynamics of the microtubule stabilizing cap**  
2                    **during stalled growth**

3                    Maurits Kok<sup>a</sup>, Florian Huber<sup>a,b,c</sup>, Svenja-Marei Kalisch<sup>a</sup>, and Marileen Dogterom<sup>a,\*</sup>

4                    <sup>a</sup> *Department of Bionanoscience, Kavli Institute of Nanoscience, Faculty of Applied Sciences,*  
5                    *Delft Institute of Technology, van der Maasweg 9, 2629 HZ Delft, The Netherlands*

6                    <sup>b</sup> *Netherlands eScience Center, Science Park 140, 1098XG Amsterdam, The Netherlands*

7                    <sup>c</sup> *present affiliation: Center for Digitalization and Digitality, HSD – University of Applied*  
8                    *Sciences, Münsterstraße 156, 40476 Düsseldorf, Germany*

9

10                    \* Correspondence to: Marileen Dogterom ([m.dogterom@tudelft.nl](mailto:m.dogterom@tudelft.nl), +31 (0)15 278 5937)

11

12

13                    **Key words**

14                    microtubules, EB3, dynamic instability, *in vitro* reconstitution, 1D model, microfabricated  
15                    barriers, Monte Carlo simulation

16 **ABSTRACT**

17 Microtubule stability is known to be governed by a stabilizing GTP/GDP-Pi cap, but the exact  
18 relation between growth velocity, GTP hydrolysis and catastrophes remains unclear. We  
19 investigate the dynamics of the stabilizing cap through *in vitro* reconstitution of microtubule  
20 dynamics in contact with micro-fabricated barriers, using the plus-end binding protein GFP-  
21 EB3 as a marker for the nucleotide state of the tip. The interaction of growing microtubules  
22 with steric objects is known to slow down microtubule growth and accelerate catastrophes. We  
23 show that the lifetime distributions of stalled microtubules, as well as the corresponding lifetime  
24 distributions of freely growing microtubules, can be fully described with a simple  
25 phenomenological 1D model based on noisy microtubule growth and a single EB3-dependent  
26 hydrolysis rate. This same model is furthermore capable of explaining both the previously  
27 reported mild catastrophe dependence on microtubule growth rates and the catastrophe statistics  
28 during tubulin washout experiments.

## 29 INTRODUCTION

30 Microtubules are hollow cylindrical polymers consisting of  $\alpha\beta$ -tubulin dimers arranged in a  
31 head-to-tail fashion to form protofilaments, ~13 of which typically constitute the microtubule  
32 lattice (Debs et al., 2020; Tilney et al., 1973; Zhang et al., 2015). Individual microtubules  
33 constantly switch between phases of growth and shrinkage, a fundamental process known as  
34 dynamic instability (Mitchison and Kirschner, 1984). As a major constituent of the eukaryotic  
35 cytoskeleton, microtubules are involved in many essential processes within the cell, including  
36 intracellular transport, cell division, and cell morphology (Akhmanova and Steinmetz, 2015).  
37 During these processes, dynamic microtubule ends interact with other cellular components,  
38 either through intermediary protein complexes or through direct physical contact (Colin et al.,  
39 2018; Dogterom and Koenderink, 2019; Gurel et al., 2014; Nguyen-Ngoc et al., 2007; Preciado  
40 Lopez et al., 2014; Waterman-Storer et al., 1995). Such contacts typically affect the dynamic  
41 behaviour of microtubule ends which is integral to the biological function of these interactions  
42 (Bouchet et al., 2016; Brangwynne et al., 2006; Gregoret et al., 2006; Komarova et al., 2002;  
43 Letort et al., 2016; Tischer et al., 2009; Vleugel et al., 2016).

44 The biochemical mechanism behind the stochastic transition from growth to shrinkage,  
45 known as a catastrophe, is related to the progressive hydrolysis of GTP bound to  $\beta$ -tubulin  
46 (Carlier and Pantaloni, 1982; Nogales, 1999). During polymerization, the microtubule tip is  
47 highly dynamic due to continuous addition and removal of tubulin dimers (Gardner et al.,  
48 2011a; Kerssemakers et al., 2006; Rickman et al., 2017; Schek et al., 2007). After GTP-bound  
49 tubulin is incorporated at the microtubule tip, hydrolysis of the nucleotide followed by Pi  
50 release is hypothesized to lead to a destabilization of the lattice by a compaction around the  
51 exchangeable nucleotide (Alushin et al., 2014; Zhang et al., 2015). The delay between tubulin  
52 incorporation and hydrolysis results in a GTP/GDP-Pi enriched region at the microtubule tip,  
53 which gives rise to what is known as the stabilizing cap (Carlier and Pantaloni, 1981). Upon  
54 the loss of the stabilizing cap, a catastrophe follows upon which the strain build-up in the lattice  
55 is released during depolymerization. However, whereas this basic description of the  
56 biochemistry behind dynamic instability is generally accepted, the exact relation between GTP  
57 hydrolysis, the size of the stabilizing cap, the details of microtubule growth and the statistics of  
58 catastrophes is still not fully understood, despite the availability of a wealth of quantitative data  
59 on catastrophe statistics under different conditions (Brouhard and Rice, 2018; Ohi and Zanic,  
60 2016).

61 Various estimates of the stabilizing cap size have been reported, from short caps of a  
62 few terminal tubulin layers (Brun et al., 2009; Caplow and Shanks, 1996; Drechsel and  
63 Kirschner, 1994; Karr and Purich, 1978; Walker et al., 1991) to longer caps spanning up to  
64 dozens of layers (Carlier and Pantaloni, 1981; Seetapun et al., 2012). In recent years, direct  
65 visualisation of the tubulin nucleotide state has become possible with the family of end binding  
66 proteins (EBs) that can autonomously bind to the GDP-Pi region at the microtubule tip (Maurer  
67 et al., 2011). It has been shown that the size of the EB comet at the tip correlates with the size  
68 of the stabilizing cap and consequently with microtubule stability (Duellberg et al., 2016a;  
69 Seetapun et al., 2012; Zhang et al., 2015). In fact, tubulin washout experiments using Mal3 (the  
70 EB1 homolog in yeast) suggest that not the size of the total EB binding region is decisive in  
71 preventing a catastrophe, but the presence of a critical number of unhydrolyzed subunits at the  
72 terminal ~10 tubulin layers at the microtubule tip (~130 dimers) (Duellberg et al., 2016a).

73

74 Here we use the ability of EB3 to report on the status of the stabilizing cap to investigate the  
75 detailed relation between cap dynamics and catastrophe statistics for stalling microtubules that  
76 are pushing against microfabricated barriers. A stalling microtubule exerts a pushing force that  
77 is too small to overcome its critical buckling force, resulting in the blocking of further  
78 microtubule growth. The stability of pushing microtubules has previously been studied for  
79 buckling and bending microtubules *in vitro* (Janson et al., 2003), *in vivo* (Brangwynne et al.,  
80 2007; Odde et al., 1999; Pallavicini et al., 2017), and *in silico* (Das et al., 2014; Valiyakath and  
81 Gopalakrishnan, 2018). It was established that microtubules generating pushing forces against  
82 rigid barriers *in vitro* experience an increased catastrophe frequency (Janson et al., 2003; Laan  
83 et al., 2008). This force-induced catastrophe is thought to be the result of a reduction in the  
84 addition of tubulin dimers as the microtubule growth velocity is slowed with increasing force  
85 (Janson et al., 2003; Kerssemakers et al., 2006). However, exactly how the reduction of tubulin  
86 addition in combination with nucleotide hydrolysis affects the dynamics of the stabilizing cap,  
87 and thereby determines the lifetime statistics for stalled microtubules, has remained unresolved.

88 We determine the lifetime statistics of stalling microtubules *in vitro* by growing  
89 microtubules against micro-fabricated barriers using GFP-EB3 as a proxy for the size of the  
90 stabilizing cap. By introducing a novel barrier design with a long overhang, we ensure that  
91 microtubule stalling can be imaged simultaneously with the EB3 signal using TIRF microscopy.  
92 We observe that microtubule stalling increases the catastrophe frequency in the absence of EB3

93 as previously reported (Janson et al., 2003). In the presence of EB3 the microtubule lifetime is  
94 further reduced in a concentration dependent manner. Surprisingly, the full decay of the EB3  
95 comet during microtubule stalling does not necessarily lead to an immediate catastrophe. We  
96 compare our results to similar data obtained for freely growing microtubules under the same  
97 conditions, and then perform simulations of microtubule dynamics based on a simple model in  
98 an attempt to simultaneously explain both data sets.

99 Over the years, different types of models have been proposed to gain a better  
100 understanding of what triggers a catastrophe. Biochemical models rely on the hydrolysis of  
101 tubulin dimers to reduce the size of the stabilizing cap to trigger a catastrophe (Bayley et al.,  
102 1989; Brun et al., 2009; Chen and Hill, 1985; Gardner et al., 2011a; Margolin et al., 2012;  
103 Padinhateeri et al., 2012; Piedra et al., 2016; VanBuren et al., 2002). However, only with the  
104 introduction of lateral interactions between dimers in a 2D model can these models capture  
105 observed growth fluctuations (Gardner et al., 2011a) and observed microtubule lifetimes  
106 (Bowne-Anderson et al., 2013; Lee and Terentjev, 2019). Mechanochemical models  
107 additionally include the build-up of strain in the lattice and protofilament bending at the tip  
108 (Bollinger and Stevens, 2019; Coombes et al., 2013; McIntosh et al., 2018; Michaels et al.,  
109 2020; Molodtsov et al., 2005; VanBuren et al., 2005; Zakharov et al., 2015). Both types of  
110 models can explain a variety of experimental observations of dynamic instability, but they  
111 typically require many fitting parameters and do not explicitly include the highly dynamic  
112 nature of the microtubule tip. Alternatively, simple phenomenological models have been useful  
113 in obtaining an intuitive insight into the principles behind microtubule dynamics and the effect  
114 of microtubule associated proteins (Brun et al., 2009; Duellberg et al., 2016a; Flyvbjerg et al.,  
115 1996; Rickman et al., 2017).

116 To find a minimal model capable of explaining microtubule catastrophe statistics with  
117 the smallest possible number of fitting parameters, we use coarse-grained Monte Carlo  
118 simulations of 1D filaments (Flyvbjerg et al., 1996; Margolin et al., 2006; Padinhateeri et al.,  
119 2012; Rickman et al., 2017). We show that the lifetimes of both freely growing and stalled  
120 microtubules can be explained by a combination of random GTP hydrolysis and a parameter  
121 that characterises the noisiness of microtubule growth, a concept that was generally missing  
122 from previous phenomenological models in the description of microtubule lifetimes. We  
123 confirm that while the EB binding region is a measure for the size of the stabilizing cap, there  
124 is no one-to-one correlation between its presence and the onset of a catastrophe. Instead, the  
125 data are consistent with a catastrophe being triggered when a large enough sequence of GDP-

126 bound tubulin dimers becomes exposed at the microtubule tip. Importantly, this 1D biochemical  
127 model can also successfully capture the previously reported catastrophe dependence on tubulin  
128 concentration, taking into account previously reported velocity-dependent growth fluctuations,  
129 and it is in good agreement with previously reported catastrophe delays after tubulin dilution.  
130 The so-called “ageing” of microtubules, referring to the observed increase of the catastrophe  
131 frequency with microtubule age (Coombes et al., 2013; Duellberg et al., 2016b; Gardner et al.,  
132 2011b; Odde et al., 1995), is not a feature of our simple model, but this behaviour naturally  
133 emerges by additionally assuming that microtubule growth fluctuations increase with  
134 microtubule age.

135

## 136 **RESULTS**

### 137 ***In vitro* reconstitution of microtubule stalling**

138 To investigate the stability of stalling microtubules in the presence of different concentrations  
139 of GFP-EB3, we analysed the dynamics of microtubules growing against micro-fabricated  
140 barriers using an *in vitro* reconstitution assay (Bieling et al., 2007; Kalisch et al., 2011). We  
141 assume each microtubule to consist of three regions: 1) a GTP rich terminal region where  
142 protofilament growth takes place (Maurer et al., 2014; McIntosh et al., 2018), 2) a region  
143 containing the intermediate GDP-Pi state to which EB3 preferably binds (Maurer et al., 2011),  
144 and 3) the GDP lattice (Fig. 1A). The presence of EB3 is known to increase both the GTP  
145 hydrolysis rate and the microtubule growth velocity by respectively compacting the  
146 microtubule lattice and closing the lattice seam (Maurer et al., 2014; Zhang et al., 2015).  
147 Microtubules were nucleated from GMPCPP-stabilized seeds and imaged with Total Internal  
148 Reflection Fluorescence (TIRF) microscopy. The barriers were composed of 100 nm SiO<sub>2</sub>  
149 deposited on a glass coverslip with an amorphous silicon carbide (SiC) overhang,  
150 approximately 1.5 µm long, to trap the microtubules and force them to grow into the barriers  
151 (Fig. 1BC). SiC is a mechanically stable, optically transparent material (wavelengths > 0.5 µm)  
152 with similar passivation and functionalization properties as SiO<sub>2</sub> due to a very thin native oxide  
153 layer on its surface (Coletti et al., 2007; Dhar et al., 2009). Although fabrication of the barriers  
154 requires a thin 10 nm layer of SiC on the glass surface (see Methods for details), microtubules  
155 can be imaged successfully with TIRF microscopy (Fig. 1D and S1). This novel barrier design  
156 enables high resolution imaging with TIRF microscopy as the microtubules are forced to remain  
157 within 100 nm from the surface during barrier contact, eliminating fluctuations perpendicular  
158 to the surface. The width between two barriers is 15 µm, chosen to keep the microtubules short  
159 and thereby reduce the probability of observing slipping and buckling events (Janson et al.,  
160 2003). All experiments were performed in the presence of 15 µM tubulin, and 0, 20, 50, or 100  
161 nM GFP-EB3.



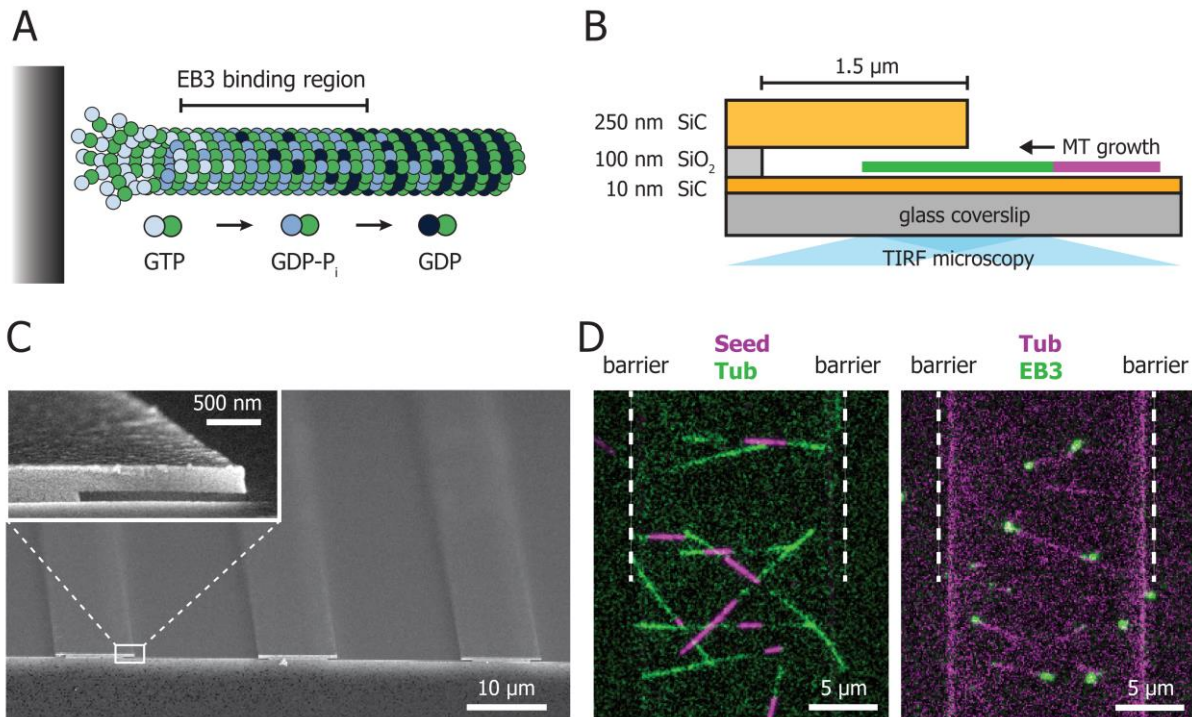

162  
 163 **Figure 1. *In vitro* reconstitution of microtubule stalling.** (A) Schematic depiction of the nucleotide distribution at the  
 164 microtubule tip. Progressive hydrolysis of GTP-tubulin after incorporation leads to a destabilized lattice that is stabilized by a  
 165 GTP/GDP-Pi cap. EB3 chiefly binds to the GDP-Pi rich region. During microtubule-barrier contact, reduction of microtubule  
 166 growth and ongoing hydrolysis are hypothesized to lead to an accelerated loss of the protective cap. (B) Schematic of the  
 167 micro-fabricated barrier with a 1.5  $\mu\text{m}$  overhang made of silicon carbide (SiC). The barrier itself is composed of SiO<sub>2</sub> and is  
 168 100 nm high, forcing the growing microtubules to remain within the TIRF illumination field. Microtubules are grown from  
 169 stabilized GMPCPP seeds. (C) Scanning Electron Microscope image of two channels with barriers. The insert shows a zoom  
 170 of the barrier with a 1.5  $\mu\text{m}$  SiC overhang. (D) TIRF images of the micro-fabricated channel enclosed by two barriers (white  
 171 dotted lines). On the left microtubules (green) are nucleated from GMPCPP-stabilized seeds (magenta) towards the barriers  
 172 and on the right microtubules (magenta) polymerize towards the barriers in the presence of GFP-EB3 (green). See also Fig S1  
 173 and Videos S1 and S2.

174  
 175 **Complete EB3 decay is neither needed for, nor always immediately followed by a**  
 176 **catastrophe**

177 The microtubule-barrier contact events leading to a stalling microtubule were analysed with  
 178 kymographs to obtain the contact duration and GFP-EB3 comet intensity prior and during  
 179 contact (Fig. 2A and S1, see Methods for details). Any contact events leading to microtubule  
 180 buckling or sliding along the barrier were excluded from the analysis. From the moment of  
 181 barrier contact, the EB3 intensity at the microtubule tip decreased until the onset of catastrophe  
 182 (Fig. 2B, S1D). We observed that for ~65% of all stalling events, a catastrophe occurred while  
 183 the EB comet was still decaying (> 10% of the EB signal remaining) (Fig 2C, right). For those  
 184 events, the mean comet intensity at the moment of catastrophe was 16% of the pre-contact



185 mean. For the remaining ~35% of stalling events we found a decay of the EB comet to a steady  
 186 near-zero value which did not immediately lead to catastrophe. Instead, the microtubules  
 187 remained in contact with the barrier for some time, even in the absence of an observable EB3  
 188 comet (Fig. 2C, left). Fitting the average EB decay from the moment of barrier contact with a  
 189 mono-exponential function, shows that the decay rate increases with EB3 concentration: 0.24  
 190  $s^{-1}$ , 0.29  $s^{-1}$ , and 0.40  $s^{-1}$  for 20, 50, and 100 nM EB3 respectively (Fig. 2D). The presence of  
 191 EB3 thus accelerates the decay of the EB comet during stalling events as predicted from its  
 192 increasing effect on the GTP hydrolysis rate (Maurer et al., 2014; Zhang et al., 2015).

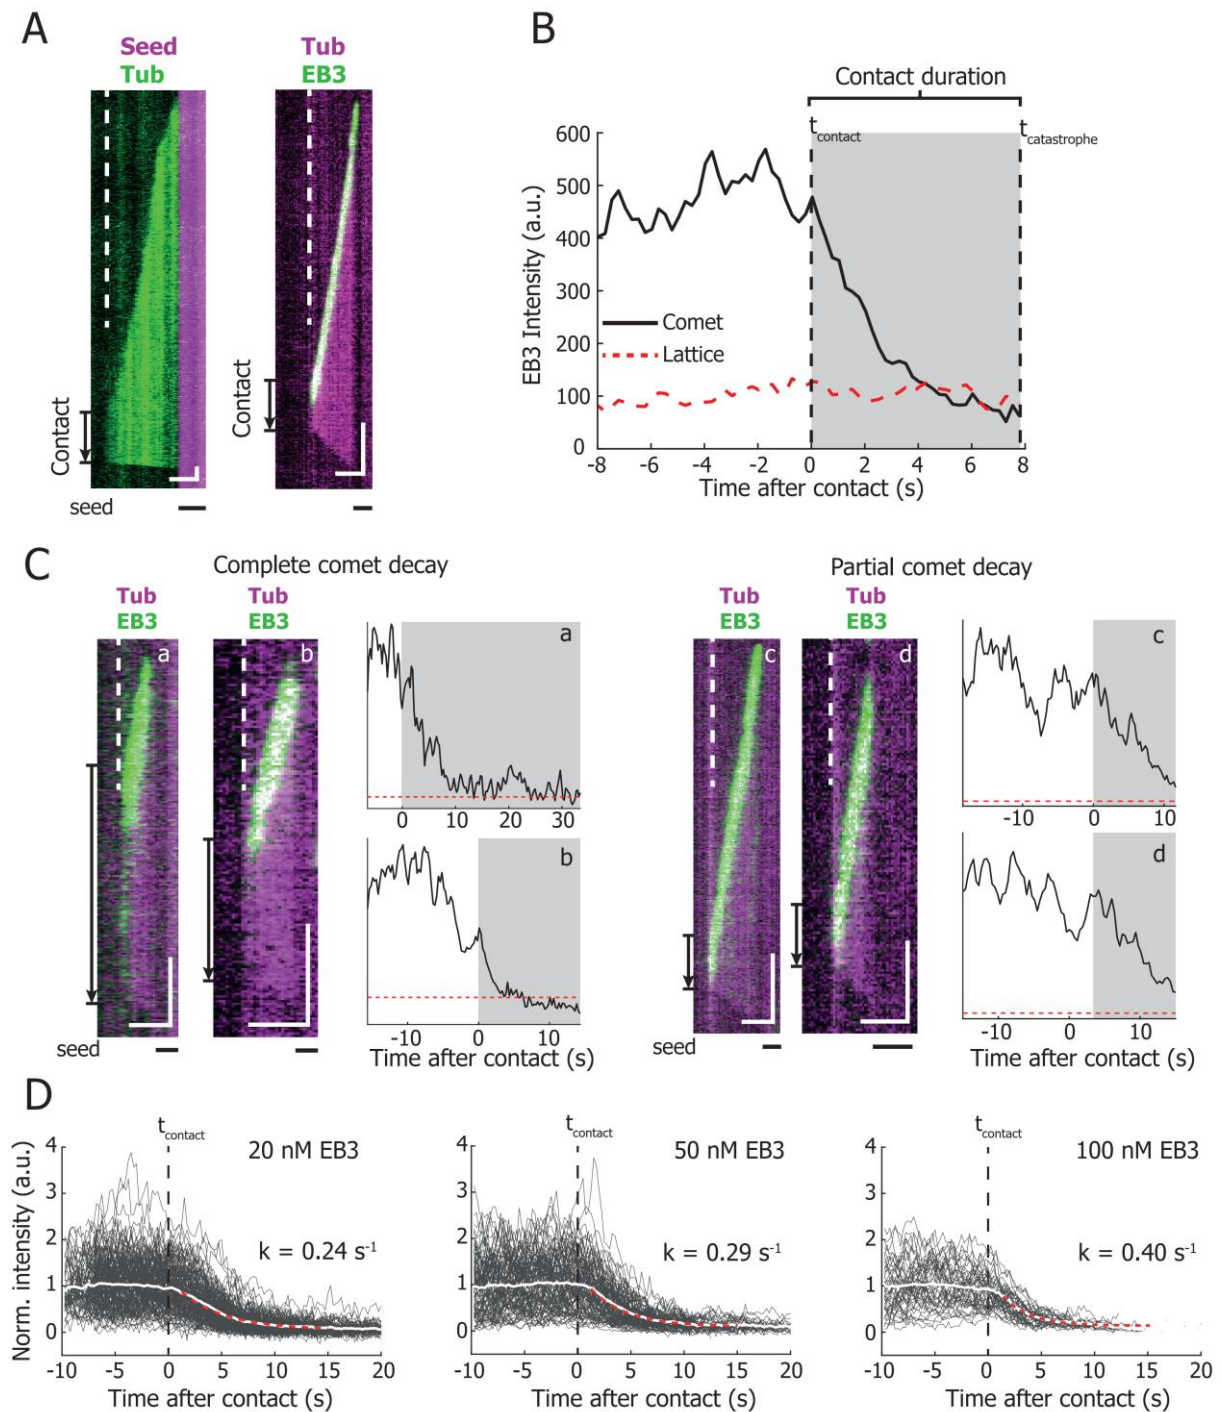

193

194 **Figure 2. Microtubule stalling events *in vitro*.** (A) Representative kymographs of a microtubule-barrier contact event in the  
195 presence of 15  $\mu\text{M}$  Hilyte488-labelled tubulin (left) and in the presence of 15  $\mu\text{M}$  rhodamine-labelled tubulin with 20 nM  
196 GFP-EB3 (right). The dotted line denotes the position of the  $\text{SiO}_2$  barrier. The duration of barrier contact is indicated with an  
197 arrow. Scale bars: 2  $\mu\text{m}$  (horizontal) and 10 s (vertical). (B) Mean intensity of the EB3 comet and the EB3 signal on the  
198 microtubule lattice of the kymograph on the right in (A). From the moment of microtubule-barrier contact ( $t_{\text{contact}}$ ), the EB3  
199 comet signal decays to the level of the microtubule lattice, ultimately resulting in the onset of a catastrophe ( $t_{\text{catastrophe}}$ )  
200 after 7.75 seconds. (C) Several examples of stalling microtubules with their respective comet intensity traces. Traces **a-b**  
201 show a full comet decay during barrier contact before the onset of a catastrophe, whereas the comet in traces **c-d** only  
202 partially decays. All traces were in the presence of 15  $\mu\text{M}$  tubulin. Additionally, trace **a** contained 20 nM EB3, trace **b** and **c**  
203 100 nM EB3, and trace **d** 50 nM EB3. Arrows and shaded regions illustrate the duration of microtubule stalling event. Scale  
204 bars: 2  $\mu\text{m}$  (horizontal) and 10 s (vertical). (D) Normalized comet intensity traces of stalling microtubules in the presence of  
205 20, 50, and 100 nM EB3, aligned on the moment of barrier contact ( $t_{\text{contact}}$ ). The mean decays were fitted with a mono-  
206 exponential model and show an increasing decay rate with increasing EB3 concentrations, resulting in decay rates of 0.24  $\text{s}^{-1}$ ,  
207 0.29  $\text{s}^{-1}$ , and 0.40  $\text{s}^{-1}$  for 20, 50, and 100 nM respectively. Number of stalling events analysed: 20 nM,  $n = 151$ , 50 nM,  $n =$   
208 104, and 100 nM,  $n = 92$ .

209

## 210 **Monte Carlo simulation of microtubule catastrophes**

211 To determine whether microtubule lifetime statistics of stalling microtubules can be understood  
212 solely by a single stochastic hydrolysis step combined with net stalling of noisy microtubule  
213 growth, we performed minimalistic Monte Carlo simulations of both free and stalled  
214 microtubule growth. Microtubules were treated as 1D filaments with subunits of 8/13 nm  
215 comprising two distinct states: GTP/GDP-Pi and GDP (Fig. 3A). We decided to ignore the  
216 initial transition from GTP to GDP-Pi, which was reported to be much faster than the GDP-Pi  
217 to GDP transition (Kim and Rice, 2019; Maurer et al., 2014; Rickman et al., 2017). We saw  
218 this justified by the fact that our key observations changed only very moderately when the first  
219 transition was included explicitly, whereas omitting this transition reduced the number of model  
220 parameters. Simulated microtubules grow by addition of GTP/GDP-Pi subunits which  
221 subsequently undergo random hydrolysis to GDP with rate  $k_{\text{hyd}}$  (Fig. 3A). We treat  
222 microtubule growth as a discrete, biased Gaussian random walk (Antal et al., 2007; Flyvbjerg  
223 et al., 1996), inspired by experimental observations that revealed a substantial diffusive  
224 character of the growing microtubule tip (Gardner et al., 2011a; Kerssemakers et al., 2006;  
225 Rickman et al., 2017; Schek et al., 2007). Following this model, tip growth is fully characterized  
226 by the experimentally measured mean growth velocity  $\langle V \rangle$  and the diffusion constant  $D_{\text{tip}}$ ,  
227 which may also result in occasional negative growth excursions (Fig. 3B). A catastrophe is  
228 triggered when a stabilizing cap ( $L_{\text{cap}}$ ) that results from remaining GTP/GDP-Pi subunits is  
229 lost due to a negative growth excursion and/or random hydrolysis. We assume that the

230 nucleotide state of the tubulins at the very tip of the microtubule are the most relevant for  
231 stability: a catastrophe is triggered when the number of uninterrupted GDP subunits at the very  
232 tip of the microtubule is equal or greater than  $N_{unstable}$  (Brun et al., 2009; Padinhateeri et al.,  
233 2012), independent of how many GTP/GDP-Pi subunits remain elsewhere in the lattice (Fig  
234 3CD). The length of the stabilizing cap is thus determined by the distance between the position  
235 of the microtubule tip and the position along the lattice where for the first time an uninterrupted  
236 sequence (or ‘island’) of GDP units equal or greater than the fitting parameter  $N_{unstable}$  is found  
237 (Fig. 3C). Depolymerization and rescues are not considered in the model. To exclude nucleation  
238 kinetics from the simulated lifetimes, a microtubule is considered to grow after reaching a  
239 length of 250 nm. The simulation then only requires the three fitting parameters  $k_{hyd}$ ,  $D_{tip}$ , and  
240  $N_{unstable}$ , all of which can be verified with experimental data (see below). The experimental  
241 EB3 intensity at the microtubule tip can be compared to the total number of GTP/GDP-Pi-state  
242 subunits in the simulated microtubules (Fig. 3DE, bottom).

243 Microtubule stalling is simulated by introducing a fixed maximum length  $L_{barrier}$  (Fig.  
244 3E). Any growth excursions that would bring the microtubule length to  $L > L_{barrier}$  are  
245 truncated to this maximum length. Since tip fluctuations also include occasional negative  
246 growth excursions (Fig. 3B), fluctuations of the tip position continue after barrier contact (Fig.  
247 3E).

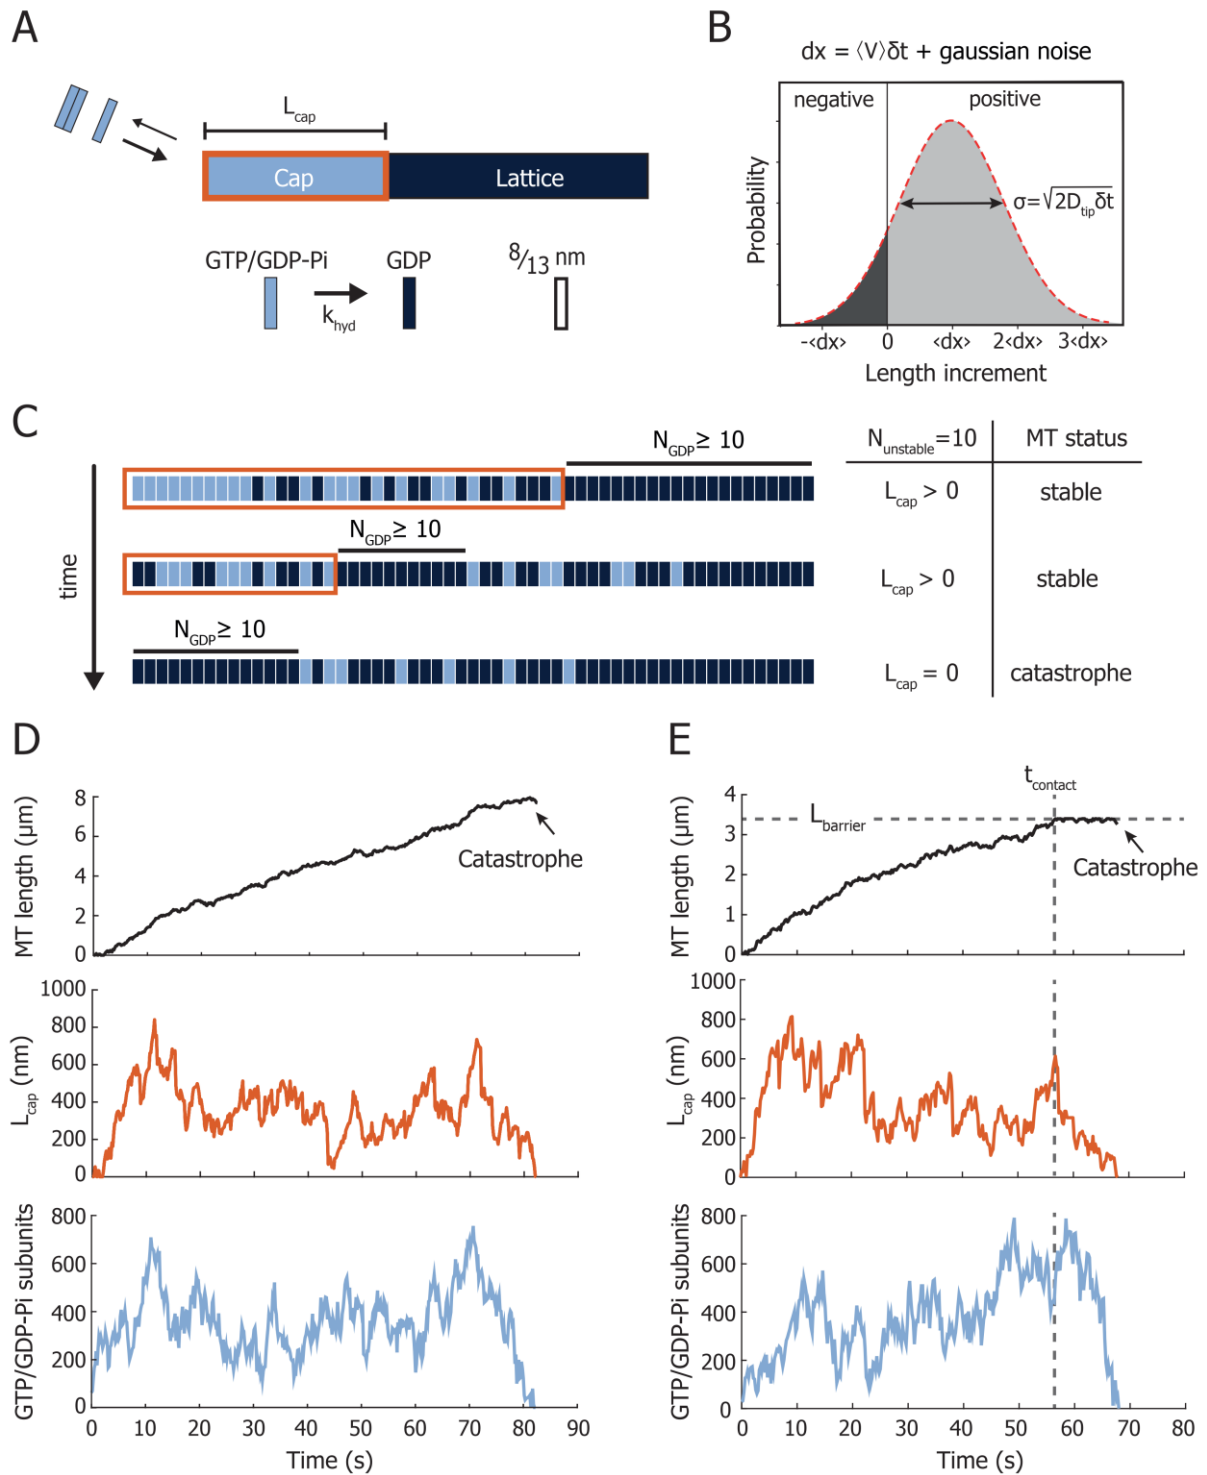

248

249

250

251

252

253

254

255

256

**Figure 3. Monte-Carlo simulation of microtubule dynamics.** (A) The microtubule is simulated as a one-dimensional lattice with two states, a GTP/GDP-Pi and a GDP state, that are approximately distributed in a cap with length  $L_{cap}$  and a lattice region respectively. The size of each subunit is  $8/13$  nm. Uncoupled stochastic hydrolysis matures the GTP/GDP-Pi-state into the GDP-state with rate  $k_{hyd}$ . (B) Microtubule growth is determined by a mean growth velocity  $\langle V \rangle$  with added Gaussian noise characterized by  $D_{tip}$ , resulting in stochastic tip elongation following a biased random walk. The diffusive character of the tip can also produce negative growth excursions. (C) Detailed schematic of the nucleotide composition of the microtubule tip. The size of the stabilizing cap (orange) is defined as the region between the microtubule tip and the position along the lattice where for the first time an uninterrupted sequence of GDP subunits is equal or greater than  $N_{unstable}$ . A

257 catastrophe is triggered when the number of uninterrupted GDP subunits at the very tip of the microtubule is equal or greater  
258 than  $N_{unstable}$ . As example, the case for  $N_{unstable} = 10$  is shown. **(D)** Simulated microtubule growing event. **(top)** During  
259 the noisy microtubule growth, the microtubule length follows a biased random walk. **(middle)** When the size of the  
260 stabilizing cap ( $L_{cap}$ ) is reduced to zero, i.e. when the number of uninterrupted terminal GDP subunits is equal or greater than  
261  $N_{unstable}$ , a catastrophe follows, and the simulation is terminated. **(bottom)** Total number of GTP/GDP-Pi subunits in the  
262 simulated microtubule, which can be compared with the experimentally obtained EB3 signal. **(E)** Simulated microtubule  
263 stalling event. Figures show the simulated microtubule length **(top)**, the size of the stabilizing cap ( $L_{cap}$ ) **(middle)**, and the  
264 total number of GTP/GDP-Pi subunits in the simulated microtubule **(bottom)**. Barrier contact is simulated by restricting the  
265 maximum length of the microtubule to  $L_{barrier}$ . As the microtubule can undergo occasional negative growth excursions due  
266 to noisy growth, the microtubule length can still fluctuate during barrier contact.

267

### 268 **Obtaining the simulation parameters**

269 Our 1D model relies on three fitting parameters,  $D_{tip}$ ,  $k_{hyd}$ , and  $N_{unstable}$ . Based on existing  
270 literature (Maurer et al., 2014), we expected that adding EB3 would have an effect on the  
271 transition from GTP/GDP-Pi to GDP. Since EB3 also affects the microtubule growth velocity,  
272 we also expected that growing microtubules may display different growth fluctuations at  
273 different EB concentrations. It hence appeared reasonable to keep  $k_{hyd}$  and  $D_{tip}$  as free fitting  
274 parameters, while keeping  $N_{unstable}$  as a global fitting parameter that is independent of the  
275 presence of EB3. We obtained values for the mean growth velocity  $\langle V \rangle$  of 1.7, 2.8, 2.8, and 3.7  
276  $\mu\text{m}/\text{min}$  for 0, 20, 50, and 100 nM EB3 respectively and a global mean seed-barrier distance  
277  $L_{barrier}$  of 3.4  $\mu\text{m}$  from the experimental data.

278 To find good fitting values, we performed systematic parameter scans across a range of  
279  $D_{tip}$  and  $k_{hyd}$ , simulating 500 microtubule growth events for each parameter combination. We  
280 simulated both freely growing and stalling microtubules and compared the distributions with  
281 the respective experimental distributions. Using a Kolmogorov-Smirnov test as a measure of  
282 the similarity between the simulated and experimental distributions, we obtained heatmaps with  
283 (normalized) similarity parameters for each compared distribution (Fig. 4A). We also included  
284 a comparison between the simulated GTP/GDP-Pi decay and the experimental EB decay rate  
285 during stalling (Fig. 2D). The resulting range of  $k_{hyd}$  values that captured the experimental  
286 decay rates was used to restrict the range of possible  $k_{hyd}$  values for the comparison of  
287 simulated and experimental lifetime distributions. The parameter set best capturing all three  
288 comparisons was then found by calculating the product between the heatmaps within the range  
289 allowed by the decay rates (Fig. 4A and S2).



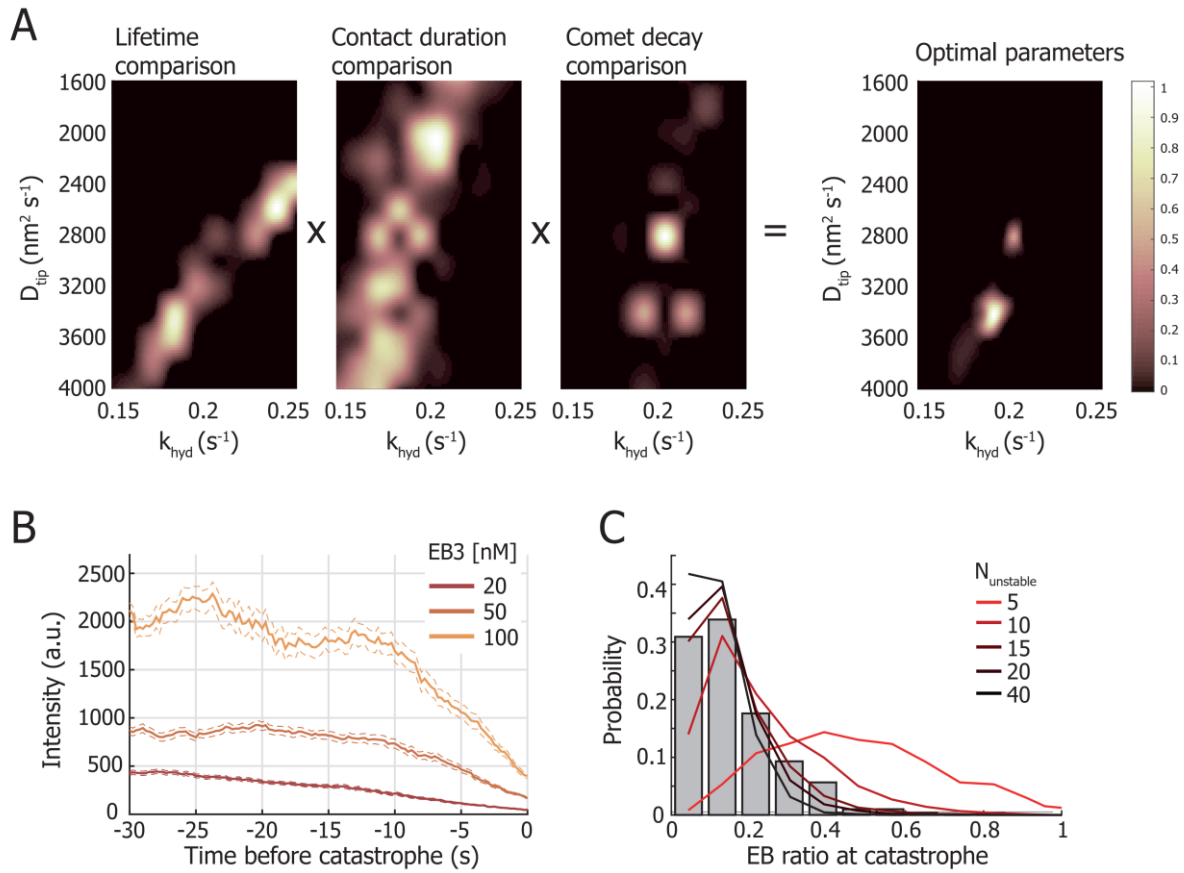

290

291 **Figure 4. Parameter determination of the 1D model.** (A) The diffusion constant  $D_{tip}$  and hydrolysis rate  $k_{hyd}$  are  
 292 determined by comparing the simulated microtubule lifetime distributions, the contact duration distributions, and the decay of  
 293 the EB signal during contact with the respective experimental distributions. The lifetime and contact duration distributions  
 294 are compared with the experimental distributions using a Kolmogorov-Smirnov test. A cubic interpolation of the similarity  
 295 values is captured in (normalized) heatmaps. The comet decay rate comparison is obtained by evaluating the absolute  
 296 difference between simulated rates and experimental rates. Evaluating the product of the three heatmaps results in a  
 297 parameter pair of  $D_{tip}$  and  $k_{hyd}$  best describing the datasets. The shown heatmaps are of 20 nM EB3. See also Fig. S2.  
 298 (B) The mean experimental EB3 signal during barrier contact, aligned on the moment of catastrophe for 20 (n=151), 50  
 299 (n=104), and 100 nM (n=92) EB3. The ratio between the steady-state EB3 signal prior to catastrophe (from -30 to -15  
 300 seconds) and at the moment of catastrophe can be compared with the simulated data. The dotted lines denote the SEM.  
 301 (C) Histogram of the ratio between the mean comet intensity during steady-state growth and the comet intensity at the  
 302 moment of catastrophe. The data is pooled from all experimental datasets of 20, 50, and 100 nM EB3 (n=347). The lines  
 303 show the simulated GTP/GDP-Pi ratio for  $N_{unstable}$  values of 5, 10, 15, 20, and 40. We find that a minimum  $N_{unstable}$  value  
 304 of 15 is required to capture the distribution of pooled experimental EB3 ratios.

305

306

307

### 308 Determining the catastrophe threshold for the 1D model

309 To determine the catastrophe threshold governed by  $N_{unstable}$ , we made use of the  
310 experimentally observed decay of the mean EB signal at the barrier (Fig. 2D). Our analysis  
311 yielded simultaneous fits of  $D_{tip}$  and  $k_{hyd}$  that were in very good agreement with our  
312 experimental observations across a wide range of  $N_{unstable}$  values. To determine an ideal value  
313 for  $N_{unstable}$  to match our data, we looked at the ratio between the mean EB3 signal during  
314 steady-state growth and the EB3 signal at the moment of catastrophe. This would give us a  
315 measure of what fraction of GTP/GDP-Pi subunits was on average hydrolysed at the moment a  
316 catastrophe occurred (Fig. 4B). Higher values for  $N_{unstable}$  gave rise to a longer stabilizing cap,  
317 resulting in a higher ratio of hydrolysed subunits in the cap at the moment of catastrophe.  
318 Comparing the combined distributions of the EB3 ratios with simulated ratios for several  
319  $N_{unstable}$  values results in a minimum  $N_{unstable}$  value of  $\sim 15$  subunits (Fig. 4C).

320

### 321 **The 1D model can successfully capture microtubule lifetimes**

322 Figures 5A and 5B show the experimental cumulative fraction of the lifetimes of freely growing  
323 microtubules and of the stalling duration respectively (bold lines), in the presence of 15  $\mu\text{M}$   
324 tubulin and 0, 20, 50, and 100 nM GFP-EB3. The distribution of free lifetimes was determined  
325 using microtubules growing parallel to the barriers. By bootstrapping each simulated  
326 distribution obtained with the best-fitting parameters (Fig. 5C), we show 25 simulated traces  
327 containing an equal number of data points as the experimental dataset (thin lines). The  
328 variability in the simulated distributions provides a good visual reference of the similarity  
329 between experiment and simulation (Fig. 5AB and S2). The distributions show that an  
330 increasing concentration of EB3 decreases the contact duration (Fig. 5BC). In the absence of  
331 EB3 the contact duration is  $30.8 \pm 1.3$  seconds (median  $\pm$  SE), whereas in the presence of 20,  
332 50, and 100 nM GFP-EB3 the contact duration is reduced to respectively  $13.0 \pm 0.7$ ,  $9.1 \pm 0.8$ ,  
333 and  $4.1 \pm 0.3$  seconds (median  $\pm$  SE). The simulated distributions capture the data well and  
334 show that free microtubule lifetimes and microtubule stalling can indeed be simultaneously  
335 captured with a 1D model comprising three parameters (Fig 5A-C). From the fits, we find that  
336 with increasing EB3 concentration,  $k_{hyd}$  increases and  $D_{tip}$  decreases (Fig. 5C).

337 Additionally, we find both fully and partially decayed GTP/GDP-Pi intensities at the  
338 moment of catastrophe, in agreement with experimentally observed event types (Fig. 5D and  
339 2C). Agreement between the experimental and simulated distributions of the remaining EB3  
340 signal at the moment of catastrophe was ensured with  $N_{unstable} = 15$  (Fig. 4C). The mean



341 decay rate of GTP/GDP-Pi subunits during stalling also matches the experimental dataset well  
 342 and increases with increasing EB3 (Fig. 5E and 2D). The simulated barrier contact events  
 343 furthermore show a similar noisy comet intensity before catastrophe, confirming that the size  
 344 of the microtubule stabilizing cap fluctuates with time.

345

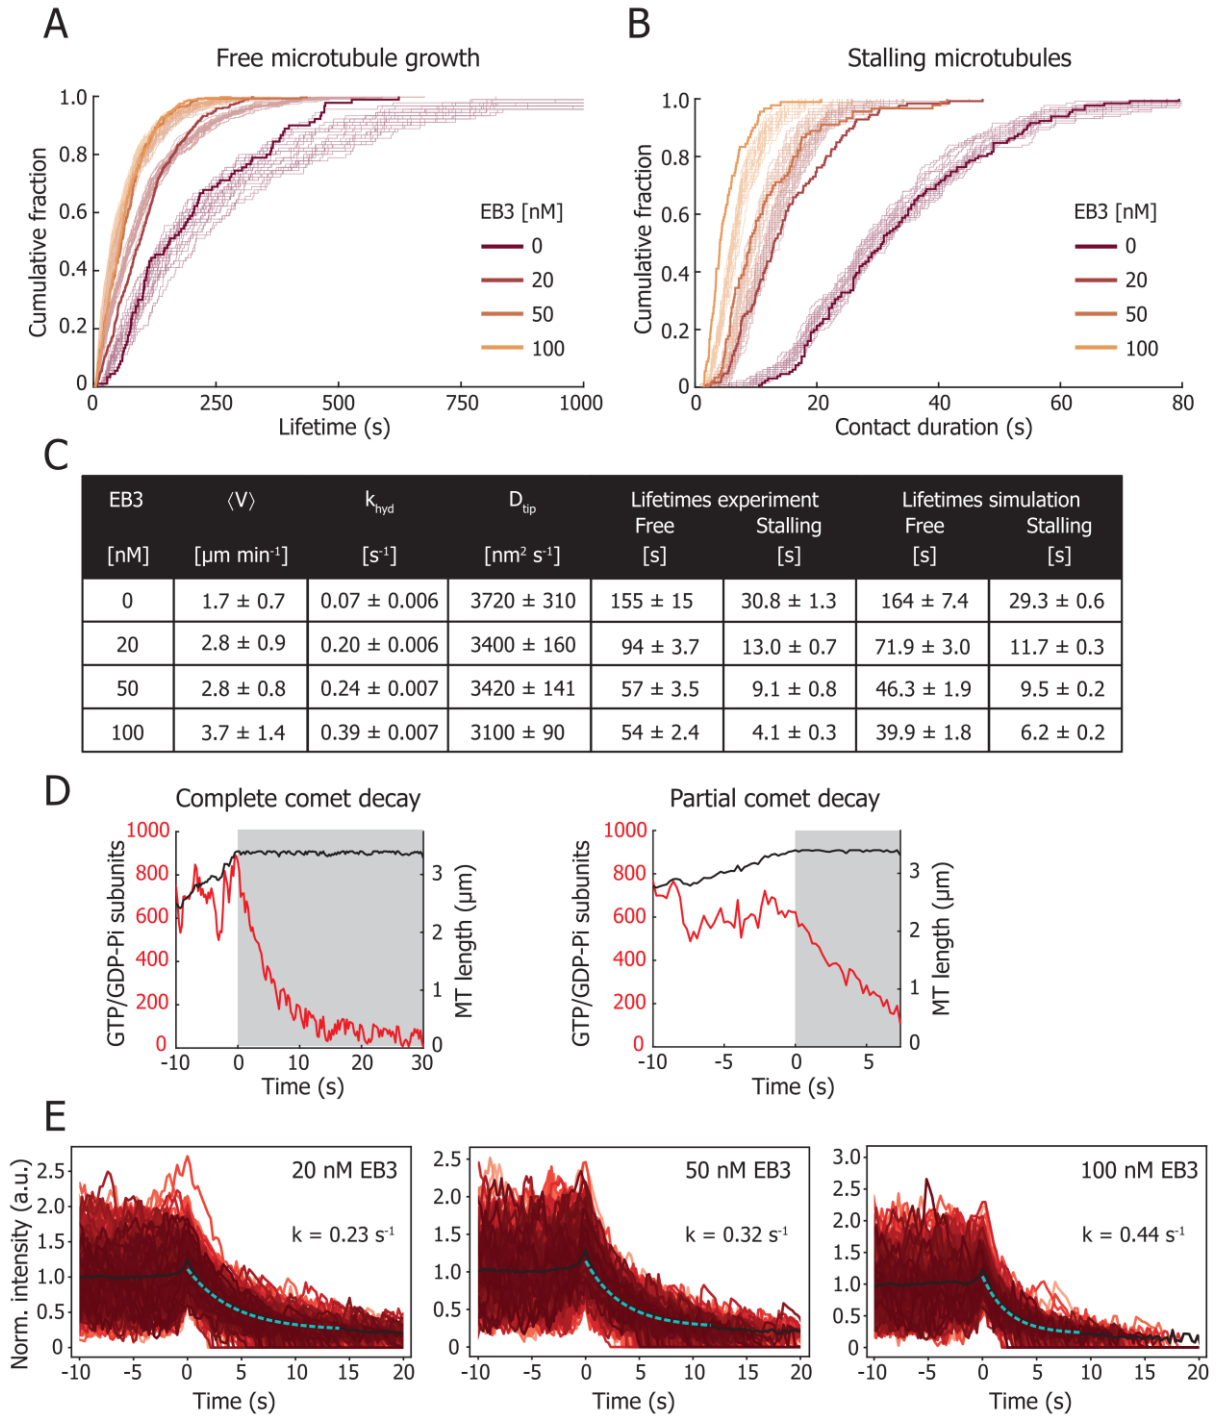

346

347 **Figure 5. Free microtubule growth and microtubule stalling.** (A) The cumulative fraction of the lifetimes of freely growing  
 348 microtubules at increasing concentrations of 0 nM (n=90), 20 nM (n=384), 50 nM (n=262), and 100 nM (n=398) EB3. All data

349 were obtained with 15  $\mu\text{M}$  tubulin. The bold lines show the experimental data and the thin lines show 25 bootstrapped simulated  
350 distributions of equal number of datapoints as the experimental distribution. **(B)** The cumulative fraction of the microtubule-  
351 barrier contact durations at increasing concentrations of 0 nM (n=131), 20 nM (n=126), 50 nM (n=90), and 100 nM (n=90)  
352 GFP-EB3. All data were obtained with 15  $\mu\text{M}$  tubulin. The bold lines show the experimental data and the thin lines show 25  
353 bootstrapped simulated distributions of equal number of datapoints as the experimental distribution. **(C)** Table with the growth  
354 velocity  $\langle V \rangle$  (mean  $\pm$  std), hydrolysis rate  $k_{hyd}$  (mean  $\pm$  95% CI), and diffusion constant  $D_{tip}$  (mean  $\pm$  95% CI) as determined  
355 to simulate the lifetimes of freely growing microtubules and the contact duration of stalling microtubules at each EB  
356 concentration (median  $\pm$  SE). **(D)** Examples of simulated stalling events, showing the microtubule length and the total number  
357 of GTP/GDP-Pi subunits in the lattice. The left trace shows a full comet decay during barrier contact before the onset of a  
358 catastrophe, whereas the comet in traces on the right only partially decays. **(E)** Simulated decay of GTP/GDP-Pi subunits during  
359 microtubule stalling at increasing EB concentration. Each dataset contains 1000 simulated events.

360

### 361 **Simulation of tubulin washout**

362 Recent experiments using microfluidics assisted washout of tubulin *in vitro* have shown that a  
363 minimal stable cap has a length of  $\sim 10$  tubulin layers at most, of which 15-30% dimers remain  
364 unhydrolysed (Duellberg et al., 2016a). The observed delay between tubulin washout and  
365 microtubule catastrophe is reported to be  $\sim 7$  seconds (Walker et al., 1991) and shown to depend  
366 on the pre-washout growth velocity (Duellberg et al., 2016a). To verify the ability of our model  
367 to describe tubulin washout experiments, we simulated tubulin washout with our obtained  
368 parameter set (Fig. 5C). To simulate washout, we prohibit any growth of the microtubule tip  
369 after 40 seconds, but still allow microtubules to undergo negative growth excursions (Fig 3B).  
370 To compare our results to published washout parameters (20  $\mu\text{M}$  tubulin with 0 and 200 nM of  
371 Mal3) (Duellberg et al., 2016a), we simulate tubulin washout for 15  $\mu\text{M}$  tubulin in the presence  
372 of 0 and 20 nM EB3, resulting in a comparable growth velocity and hydrolysis rate. The  
373 difference between the concentration of Mal3 (fission yeast homolog of EB1) and EB3 required  
374 to obtain a similar hydrolysis rate can be explained by the intrinsic structural differences (Roth  
375 et al., 2018; von Loeffelholz et al., 2017). Our simulation of tubulin washout showed a delay  
376 between washout and catastrophe of  $10.2 \pm 3.2$  and  $5.5 \pm 1.8$  seconds (mean  $\pm$  std) for 0 and 20  
377 nM EB3 (Fig. 6A), similar to the reported values of 7.3 and 3.5 seconds for 0 and 200 nM Mal3  
378 (Duellberg et al., 2016a). In addition, it was reported that microtubule growth is not simply  
379 paused after washout, but that microtubules slowly shrank prior to catastrophe. During the  
380 simulated washout delay, we measured a slow decrease in microtubule length of  $253 \pm 71$  nm  
381 (mean  $\pm$  std) for 20 nM EB3 (Fig. 6B), comparable to the reported  $165 \pm 105$  nm for 200 nM  
382 Mal3 (Duellberg et al., 2016a). Furthermore, we find that the simulated decay rate of  $0.30 \text{ s}^{-1}$   
383 (20 nM EB3) of GTP/GDP-Pi subunits from the moment of tubulin washout is in agreement  
384 with the reported  $0.33 \text{ s}^{-1}$  (200 nM Mal3) (Fig. 6C).

385 Our simulated data also captures the reported positive correlation between microtubule  
 386 stability and growth velocity (Fig. 6D) (Duellberg et al., 2016a). The simulated washout delay  
 387 increases with an increasing growth velocity as measured immediately prior to washout  
 388 (Spearman correlation coefficient of  $\rho = 0.70$ ). However, the correlation is lost when the  
 389 growth velocity is measured 10 seconds before washout ( $\rho = 0.07$ ), in agreement with  
 390 published results (Duellberg et al., 2016a). We conclude that our model is thus capable of  
 391 accurately capturing tubulin washout experiments.

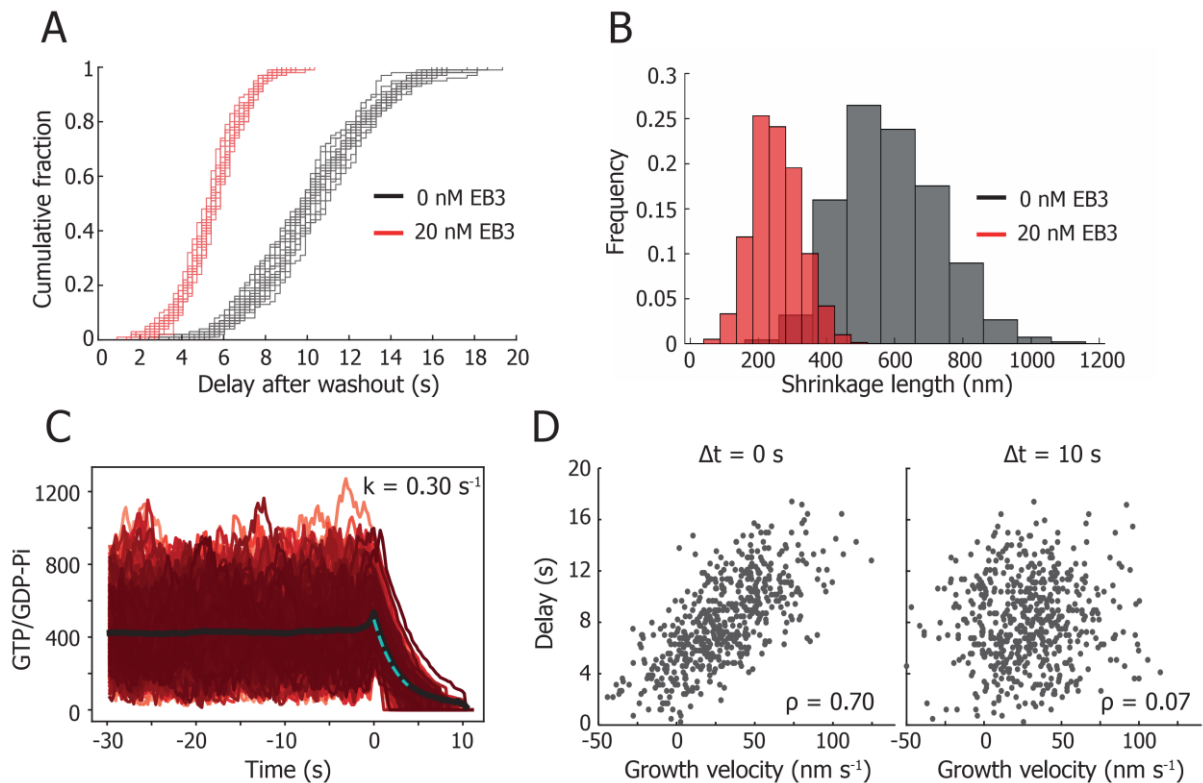

392 **Figure 6. Simulating tubulin washout.** (A) Simulation of tubulin washout following the parameters in Fig. 5C for 0 and 20  
 393 nM EB3. For both conditions, 25 bootstrapped distributions of 100 data points are shown. The mean delay duration between  
 394 washout and catastrophe is  $10.3 \pm 3.2$  and  $5.5 \pm 1.8$  seconds for 0 and 20 nM EB3 respectively (mean  $\pm$  std). (B) Simulation of  
 395 tubulin washout following the parameters in Fig. 5C for 0 and 20 nM EB3. The mean shrinkage length of the microtubule  
 396 between washout and catastrophe is  $588 \pm 144$  and  $253 \pm 71$  nm respectively (mean  $\pm$  std). (C) Simulation of the number of  
 397 GTP/GDP-Pi subunits before and during tubulin washout following the parameters in Fig. 5C for 20 nM EB3. Fitting the loss  
 398 of GTP/GDP-Pi subunits from the moment of washout gives a decay rate of  $0.30 \text{ s}^{-1}$ . (D) Scatter plot of the simulated delay  
 399 time dependency on the growth velocity before tubulin washout. Growth velocities measured immediately before tubulin  
 400 washout ( $\Delta t = 0$  seconds) show a strong correlation, which is lost for growth velocities measured  $\Delta t = 10$  seconds before  
 401 washout. The mean growth velocity is calculated from a 10 second time window.  $\rho$  is Spearman's rank correlation coefficient.  
 402  
 403

404 **The 1D model successfully captures the mild catastrophe dependence on microtubule**  
 405 **growth rates**

406 As an additional verification of our model, we simulated microtubule lifetimes and stalling  
 407 durations based on our previous experimental data (Fig. 7) (Janson et al., 2003). Our model can  
 408 simultaneously capture the reported mild reduction in catastrophe rate with increasing growth  
 409 velocity as well as the distribution of stalling durations (Fig. 7AB). To explain these data, we  
 410 had to assume a velocity-dependent tip noise (at a fixed  $k_{hyd}$  of  $0.10 \text{ s}^{-1}$ ), which is in line with  
 411 the reported dependence of the tip noise on the growth velocity (Fig. 7C) (Gardner et al., 2011a;  
 412 Rickman et al., 2017). This relationship shows a linear dependency of the tip noise on the  
 413 growth velocity, as has been developed for a 1D model (Gardner et al., 2011a; Rickman et al.,  
 414 2017):

$$415 \quad D_{tip} = \frac{a k_a + k_d}{2 k_a - k_d} \langle V \rangle$$

416 where  $a$  is the size of a dimer,  $k_a$  the tubulin addition rate, and  $k_d$  the tubulin dissociation rate.  
 417 We thus conclude that our 1D model can describe the reported mild dependence of the  
 418 microtubule lifetimes on the growth velocity.

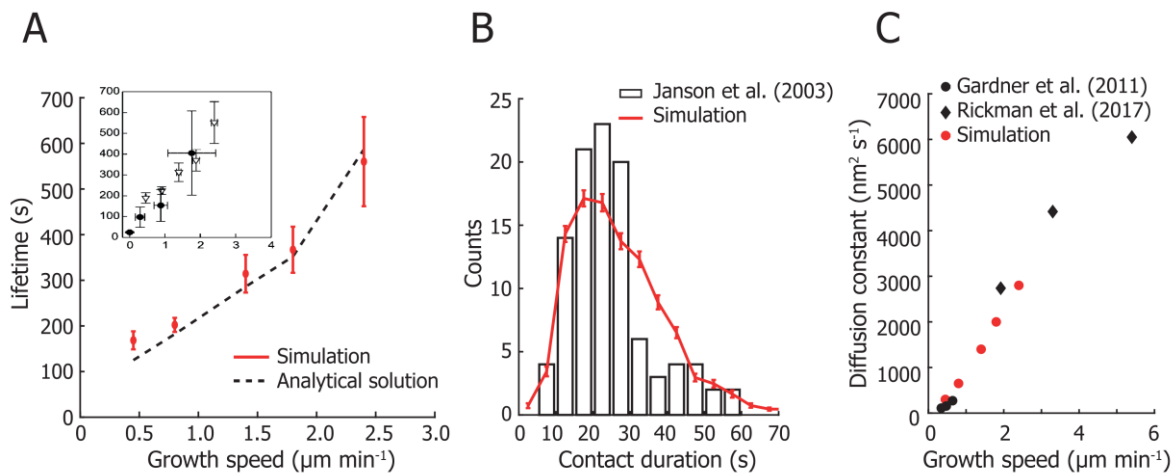

419  
 420 **Figure 7 Model evaluation.** (A) Simulation of microtubule lifetimes for increasing growth velocities. The simulation growth  
 421 velocities were obtained from (Janson et al., 2003) and combined with a global value for  $k_{hyd}$  of  $0.10 \text{ s}^{-1}$  and the determined  
 422  $N_{unstable}$  of 15. The insert shows the experimental lifetimes for freely growing microtubules (triangles) and for buckling  
 423 microtubules (dots) (Janson et al., 2003). Our simulation gives a similarly mild suppression of catastrophes with increasing  
 424 tubulin concentrations, with the growth velocities of  $0.45, 0.8, 1.4, 1.8,$  and  $2.4 \mu\text{m min}^{-1}$  corresponding to tubulin  
 425 concentrations of  $7.2$  ( $n=58$ ),  $10$  ( $n=152$ ),  $15.2$  ( $n=49$ ),  $20$  ( $n=51$ ), and  $28 \mu\text{M}$  ( $n=30$ ). Simulated lifetimes are given as mean  $\pm$   
 426 SEM with the same number of datapoints as the experimental values. The mild catastrophe suppression is also captured by the  
 427 analytical solution of our model (see Methods). (B) Histogram of the pooled stalling duration with 103 events measured at  
 428  $15.2, 20,$  and  $28 \mu\text{M}$  from (Janson et al., 2003) and the simulated stalling duration. The simulated values represent mean  $\pm$  std  
 429 for  $n = 103$  events. (C) The diffusion constant of the microtubule tip required to simulate the microtubule lifetimes in (A) based  
 430 on data from (Janson et al., 2003). These values agree with reported values by (Gardner et al., 2011a; Rickman et al., 2017)  
 431 and follow a linear dependency on the growth speed.

432

## 433 **DISCUSSION**

### 434 **EB3 enhances catastrophes for stalling microtubules**

435 Using novel micro-fabricated barriers in conjunction with TIRF microscopy, we studied the  
436 duration of barrier contact as well as the dynamics of the EB3 comet during microtubule  
437 stalling. We confirm that stalled microtubules undergo a catastrophe after  $30.8 \pm 1.3$  seconds  
438 (median  $\pm$  SE) in the absence of EB3, comparable to previously measured values (Fig. 7B)  
439 (Janson et al., 2003). The presence of EB3 further enhances catastrophes in a concentration  
440 dependent manner which results in up to five times shorter microtubule contact times at the  
441 barriers (Fig 5A-C). In earlier unpublished experiments, we made similar observations for  
442 stalling microtubules in the presence of Mal3 (Fig. S4). These shorter contact times are  
443 accompanied by an increase in the decay rate of the EB3 comet (Fig. 2D).

444 Additionally, we developed a simple phenomenological computational model that  
445 predicts catastrophe statistics based on parameters related to random (uncoupled) GTP  
446 hydrolysis and fluctuations in microtubule growth. Fitting the model to the data suggests that  
447 the size of the growth fluctuations ( $D_{tip}$ ) decreases in the presence of EB3 (Fig. 5C). This effect  
448 would support the hypothesis that the increase in growth velocity due to the presence of EB3 is  
449 the result of a lower tubulin dissociation rate at the microtubule tip. If we assume that the tubulin  
450 association rate at the microtubule tip only depends on the soluble tubulin concentration and is  
451 therefore not affected by EB3, we would indeed expect the resulting tip noise  $D_{tip}$  to be smaller  
452 with increasing concentrations of EB3. This effect could originate from EB3 binding in between  
453 protofilaments and reducing tip fluctuations or from the hypothesis that EB3 increases the  
454 growth velocity by closing the lattice seam (Zhang et al., 2015).

455

### 456 **A 1D phenomenological model successfully describes microtubule lifetimes, stalling, and** 457 **tubulin washout**

458 We developed a simple phenomenological computational model that can capture a very rich  
459 set of experimental data on dynamic microtubules. Its sole dependence on (velocity-dependent)  
460 tip noise and random hydrolysis makes it possible to build an intuition of key processes in  
461 microtubule dynamics, in particular the onset of catastrophe. We find that our model can  
462 reproduce both the experimental microtubule stalling duration and the accompanying EB comet

463 decay rate (Fig 5). At the same time, our model captures the reported mild reduction in  
464 catastrophe rate with increasing growth velocity as well as the distribution of stalling durations  
465 (Fig. 7AB). Previous 1D models were not able to describe both the mild catastrophe dependence  
466 on microtubule growth rates and the size of the stabilizing cap (Brun et al., 2009; Flyvbjerg et  
467 al., 1996). A reason for this was the assumption that tubulin dissociation is independent from  
468 the microtubule growth velocity (Bowne-Anderson et al., 2013). This necessitated introducing  
469 lateral tubulin-tubulin interactions in a 2D model to accurately capture microtubule lifetimes  
470 and cap dynamics (Brun et al., 2009; Gardner et al., 2011a). Here, we showed that introducing  
471 a highly dynamic tip in a 1D model is sufficient to accurately capture both the microtubule  
472 lifetimes as well as the size of the stabilizing cap. The magnitude of the required simulated tip  
473 noise would not be observable using fluorescence microscopy, but only with optical tweezers  
474 (Gardner et al., 2011a; Kerssemakers et al., 2006; Schek et al., 2007). The extend of any  
475 “blurring” of the microtubule tip due to tip noise during frame acquisition would remain below  
476 the observable optical resolution (Fig. S6D).

477 We furthermore showed that our model can capture tubulin washout and reproduces a  
478 similar catastrophe delay, tip shrinkage, and comet decay as previously reported (Fig. 6)  
479 (Duellberg et al., 2016a). Our model also produces the same correlation between washout  
480 delays and growth velocity as was recently observed experimentally (Duellberg et al., 2016a)  
481 and thus captures the reported momentary nature of microtubule stability. We conclude that our  
482 model can describe tubulin washout and simulate values in good agreement with experiments.

483

#### 484 **Microtubule stability depends on the distribution of hydrolysed dimers at the tip**

485 The decay of the EB3 comet during barrier contact can provide further insights into the  
486 criterium for microtubule stability. We find that microtubules can remain in a stalled state  
487 without the presence of an observable EB3 comet both in our experiments and simulations  
488 (compare Fig. 2C and 5D). This suggests that a stalled microtubule does not necessarily require  
489 a number of GTP/GDP-Pi subunits that is large enough to be observed as a comet. The effect  
490 is explained by the presence of growth fluctuations during microtubule stalling. Hydrolysed  
491 subunits at the tip are continually replaced by newly incorporated unhydrolysed subunits,  
492 reducing the probability of reaching the critical threshold of  $N_{unstable}$  at the microtubule tip.  
493 This phenomenon could also account for reported pausing events during which a microtubule



494 temporarily stops growing without triggering a catastrophe (VanBuren et al., 2005). It illustrates  
495 that the onset of a catastrophe is not fully coupled to the presence of an observable comet.

496 To determine the stretch of hydrolysed subunits at the microtubule tip required to initiate  
497 a catastrophe ( $N_{unstable}$ ), we measured the ratio between the EB3 comet intensity at the  
498 moment of catastrophe and the mean EB3 comet intensity during steady-state growth (Fig.  
499 4BC). In parallel, we evaluated the decay rates of EB3 comets after initial barrier contact. Both  
500 measures converge on a catastrophe threshold  $N_{unstable}$  of  $\sim 15$  uninterrupted hydrolysed  
501 terminal subunits, which would approximate a single tubulin layer at the tip of a real 3D  
502 microtubule, in line with experimental observations (Caplow and Shanks, 1996; Drechsel and  
503 Kirschner, 1994). A recent finding from washout experiments showing that a microtubule  
504 requires a stable cap of  $\sim 10$  tubulin layers at most (Duellberg et al., 2016a) is not at odds with  
505 our finding that a catastrophe is triggered when the terminal layer of tubulin is hydrolysed.  
506 Because the former result is based on the average remaining density of Mal3 at the moment of  
507 catastrophe after tubulin washout, it does not inform on a specific catastrophe criterium. The  
508 notion that the stabilizing cap ( $L_{cap}$ ) and the EB3 comet (GTP/GDP-Pi region) are large on  
509 average, but that only a short stretch of hydrolysed subunits at the microtubule tip is required  
510 to trigger a catastrophe, reconciles short and long cap observations (Brun et al., 2009; Duellberg  
511 et al., 2016a; Molodtsov et al., 2005; Seetapun et al., 2012; Walker et al., 1991). We thus find  
512 that the stability of a microtubule does not primarily depend on the size of the observed EB  
513 comet, but instead on the underlying distribution of hydrolysed subunits at the microtubule tip.

514

### 515 **Both the cap size and tip fluctuations determine the onset of catastrophe**

516 To better understand the size of the stabilizing cap ( $L_{cap}$ ) and its effect on the catastrophe  
517 frequency, we derived an analytical expression for the position of the sequence of hydrolysed  
518 subunits equal or greater than  $N_{unstable}$  (see Methods for details). This position is determined  
519 by  $N_{unstable}$  and the underlying distribution of hydrolysed subunits. We assume that the density  
520 of unhydrolysed dimers decreases exponentially along the microtubule lattice and is fully  
521 characterized by  $k_{hyd}$  and  $\langle V \rangle$  (Duellberg et al., 2016a; Maurer et al., 2014; Seetapun et al.,  
522 2012). By treating the microtubule lattice as a series of independent Bernoulli trials, we can  
523 obtain an expression for the mean position of the first occurrence of a series of hydrolysed  
524 subunits equal or greater than  $N_{unstable}$  (Fig. 8A and S5AB). The distance between the



525 microtubule tip and this position is equal to the size of the stabilizing cap, which means we can  
526 obtain the relation between the size of the stabilizing cap and the parameters  $N_{unstable}$ ,  $k_{hyd}$ ,  
527 and  $\langle V \rangle$  (Fig. 8BC and S5B). We find that the size of the stabilizing cap scales linearly with the  
528 growth velocity  $\langle V \rangle$  (Fig. 8B). The addition of EB3 however affects both the growth velocity  
529 and the hydrolysis rate, the combined effect of which results in a decreasing cap size with  
530 increasing EB concentration (Fig. 8C). We can calculate the mean size of the stabilizing cap in  
531 our model based on  $k_{hyd}$ ,  $\langle V \rangle$ , and  $N_{unstable}$  and compare it to the length of the GTP/GDP-Pi  
532 region for which the EB comet signal is a proxy. Taking  $L_{comet} = \frac{\langle V \rangle}{k_{hyd}}$  as the characteristic  
533 length of the EB comet (Duellberg et al., 2016a; Rickman et al., 2017), we find that the comet  
534 underestimates the size of the calculated stabilizing cap (Fig 8C).

535         Having an expression for the size of the stabilizing cap, we can now explore an intuitive  
536 view on how a catastrophe is triggered. The length of the cap is determined by two competing  
537 processes on either end, namely noisy growth at the microtubule tip and hydrolysis in the lattice.  
538 During steady-state growth, the mean length of the stabilizing cap has a constant size  
539 determined by the growth velocity  $\langle V \rangle$  and hydrolysis rate  $k_{hyd}$  (Duellberg et al., 2016a). We  
540 observe in our simulations that catastrophes for freely growing microtubules occur as a result  
541 of a short period of slowed down or negative growth (Fig 8D left and S3C), in agreement with  
542 previous experimental observations (compare Fig. S3 with Fig. 7 in (Maurer et al., 2014)). This  
543 shows that the onset of catastrophe is determined by the probability that growth fluctuations  
544 remove the stabilizing cap. When we treat the probability for a catastrophe as the probability  
545 for negative growth excursions to exceed the length of the stabilizing cap, the microtubule  
546 lifetimes are successfully reproduced with the analytical solution (Fig 7A and S5D). This holds  
547 true for catastrophes during free growth and after tubulin washout (Fig 8D left and middle).  
548 During microtubule stalling however, continuing tip fluctuations replace hydrolysed subunits  
549 at the tip for unhydrolysed subunits, reducing the effective mean hydrolysis rate. This results in  
550 slowing down of the cap end and delaying the onset of catastrophe (Fig. 8D right). Additionally,  
551 the longer catastrophe delay observed with microtubule stalling compared to tubulin washout  
552 can be explained by the different effective tip fluctuations. After tubulin washout, loss of the  
553 stabilizing cap is caused by both continued hydrolysis and the irreversible loss of tubulin  
554 subunits at the tip, whereas the tip of a stalling microtubule can still recover after loss of  
555 terminal subunits through tubulin addition and continue to fluctuate (Fig. 8D).

556

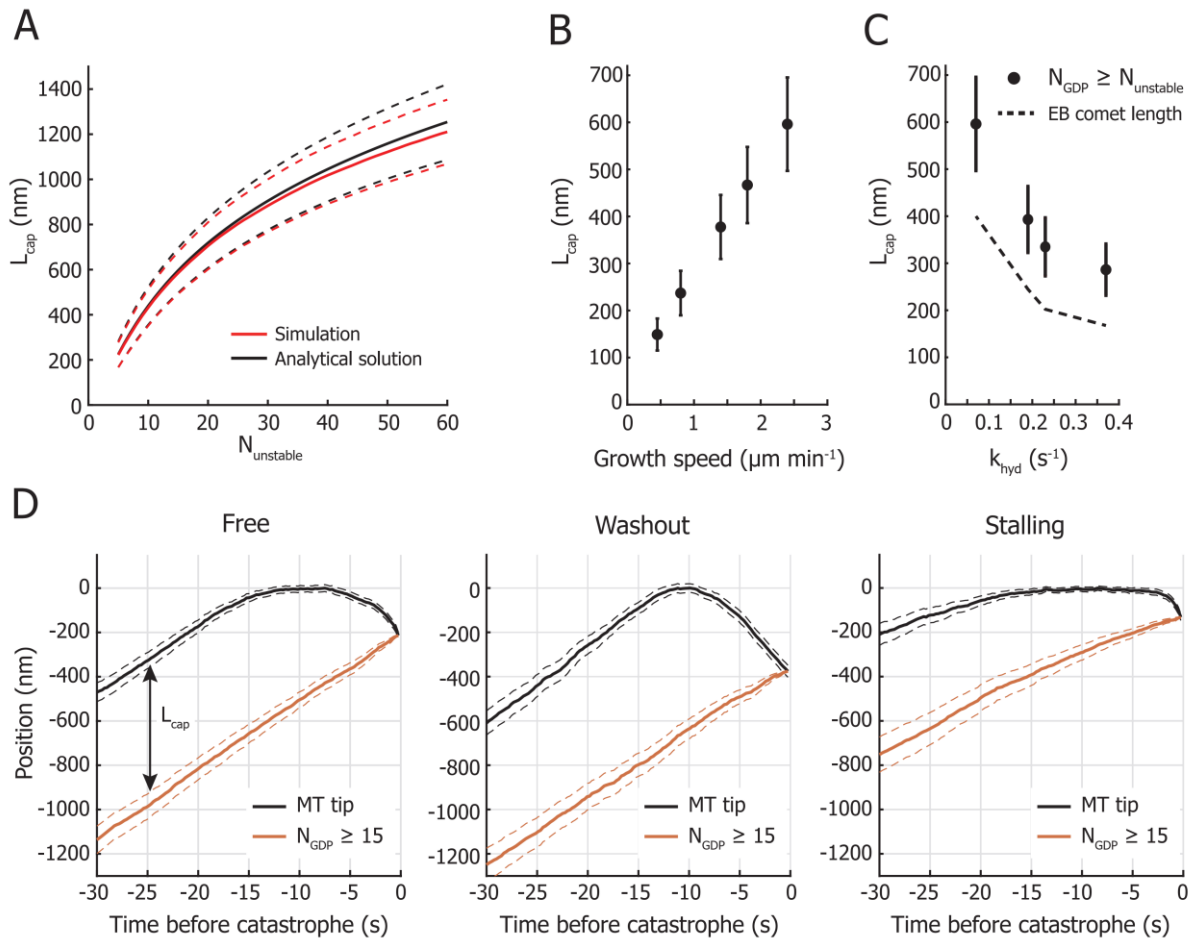

557

558 **Figure 8 Fluctuations of the stabilizing cap trigger catastrophes.** (A) Dependence of the cap length  $L_{cap}$  on  $N_{unstable}$  (mean  
559  $\pm$  std). The simulated cap length and the numerical solution based on the analytical model are in good agreement. The shown  
560 cap length was determined for the parameters of 0 nM EB3 in Fig. 5C. (B) The length of the stabilizing cap  $L_{cap}$  depends  
561 linearly on the growth velocity  $\langle V \rangle$ . The cap length was calculated with the analytical model (mean  $\pm$  std) and required a  
562 constant  $k_{hyd}$  of  $0.1 \text{ s}^{-1}$  and an  $N_{unstable}$  of 15, equal to the simulation parameters based on the data from (Janson et al., 2003)  
563 (see Fig 7B). (C) The mean length of the stabilizing cap  $L_{cap}$  decreases with increasing hydrolysis rate  $k_{hyd}$ . The dependence  
564 of the cap size on the hydrolysis rate is calculated with the analytical model (mean  $\pm$  std) and is based on the parameters of the  
565 EB concentrations 0, 20, 50, and 100 nM in Fig 5C. The size of the stabilizing cap based on the position of the sequence  
566  $N_{unstable}$  is larger than the stabilizing cap based on the characteristic length of the EB signal (GTP/GDP-Pi region). (D)  
567 Simulation of the position of the microtubule tip and of the position of the sequence of hydrolysed subunits defined by  
568  $N_{unstable} = 15$  prior to catastrophe. Mean traces are for catastrophes during microtubule free growth, after tubulin washout,  
569 and during microtubule stalling (mean  $\pm$  SE). Before the onset of catastrophe, the mean cap length  $L_{cap}$  is constant during  
570 steady-state growth as both the position of the tip and the end of the cap move with equal velocity  $\langle V \rangle$ . A catastrophe is triggered  
571 when  $L_{cap} = 0$ , which is predominantly determined by persistent negative growth excursions of the microtubule tip. All  
572 simulations were performed with the parameters for 0 nM EB (Fig. 5C).

573

574 **Microtubule ageing is not required to describe microtubule lifetimes**

575 An observed feature of microtubule stability lacking in our model is an age-dependent  
576 catastrophe frequency. It has been reported that “younger” microtubules are more stable than  
577 “older” ones (Gardner et al., 2011b; Odde et al., 1995). Ageing has also been observed through  
578 a gradual reduction of the EB comet intensity during steady-state growth (Maurer et al., 2012;  
579 Mohan et al., 2013) and through shorter catastrophe delays after tubulin washout for older  
580 microtubules (Duellberg et al., 2016b). The two proposed processes responsible for inferring  
581 ageing are either based on a multi-step lattice defect model (Bowne-Anderson et al., 2013;  
582 Mohan et al., 2013) or on tapering of the microtubule tip during growth (Chretien et al., 1995;  
583 Coombes et al., 2013; Duellberg et al., 2016b; VanBuren et al., 2005). Invariably, these  
584 mechanisms are tightly coupled to the onset of a catastrophe and are required to understand  
585 microtubule lifetimes. In our model however, we find that the onset of a catastrophe is  
586 independent from microtubule ageing.

587 Microtubule ageing is generally characterized by fitting lifetime distributions to a Gamma  
588 distribution to obtain the shape parameter, a measure for the number of sequential steps required  
589 to trigger a catastrophe (Gardner et al., 2011b; Odde et al., 1995). In our experimental lifetime  
590 distribution, we find that the Gamma shape parameter is independent from the EB concentration  
591 (Fig. S6A), in line with previous reports (Mohan et al., 2013). To account for microtubule  
592 ageing in our model, we introduced time-dependent tip fluctuations (Fig. S6B). Increasing the  
593 growth fluctuations with time while keeping the mean growth velocity constant, increases the  
594 probability of reducing the stabilizing cap to zero due to an increase in negative growth  
595 excursions. By increasing  $D_{tip}$  with a rate of  $0.025 \text{ s}^{-1}$  following a bounded exponential curve,  
596 we can reproduce the experimental ageing parameters (Fig. S6C). Linking microtubule ageing  
597 to an increase in tip noise and not to the hydrolysis rate or to the accumulation of defects in the  
598 microtubule lattice also agrees with previous studies (Zakharov et al., 2015). It was reported  
599 that microtubule ageing is in fact correlated with the frequency of encountering curled  
600 protofilaments (Zakharov et al., 2015), an effect that can be represented with our  
601 phenomenological description of increasing tip noise (McIntosh et al., 2018). So, although  
602 microtubule ageing is not required to accurately capture microtubule lifetimes, it can be easily  
603 incorporated by introducing time-dependent tip fluctuations.

604

605

606

## 607 **Outlook**

608 Our experimental setup will be useful for studying microtubule interactions and the  
609 functional effect of stabilizing and destabilizing microtubule associated proteins. Our approach  
610 can be used to study the influence of MAPs (Meadows et al., 2018), tubulin isotypes and PTMs  
611 (Sirajuddin et al., 2014) on the stability of pushing microtubules. Furthermore, the SiC  
612 overhangs are designed to be compatible with a previously published method to specifically  
613 functionalize the barriers with protein complexes (Taberner et al., 2014), enabling the study of  
614 microtubule end-on interactions with TIRF microscopy (Vleugel et al., 2016).

615 A possible extension of our 1D model to describe the effect of +TIPs on microtubule  
616 dynamics in general could be to characterize them phenomenologically by their effect on GTP  
617 hydrolysis and tip fluctuations. As the effect of EB3 can be described this way, we hypothesize  
618 that the effect of other microtubule associated proteins can be characterized similarly. To allow  
619 future extensions and modifications of our model, we have made the simulation source code  
620 available under an open-source licence on GitHub ([https://github.com/florian-](https://github.com/florian-huber/mtdynamics)  
621 [huber/mtdynamics](https://github.com/florian-huber/mtdynamics)) with extra documentation.

622

## 623 **METHODS AND MATERIALS**

### 624 **Proteins**

625 GFP-EB3 was a kind gift from Michel Steinmetz. All tubulin products were acquired from  
626 Cytoskeleton Inc, with all unlabelled tubulin specifically from a single lot.

627

### 628 **Microfabrication of barriers**

629 The fabrication method for the micro-fabricated barriers with an SiC overhang is inspired by  
630 (Kalisch et al., 2011), (Taberner et al., 2014), and (Aher et al., 2018). All fabrication steps were  
631 performed in a cleanroom environment (van Leeuwenhoek Laboratory, NanoLab NL). The  
632 barrier was designed with the following considerations in mind:

- 633 - The width of the channels should favour stalling events over buckling events, but remain  
634 large enough for GMPCPP-stabilized seeds to easily land.
- 635 - A bottom layer of SiC is needed to prevent etching into the coverslip during a Buffered  
636 Oxide Etch. This layer needs to be as thin as possible to prevent photon absorption by  
637 the semiconductor resulting in a diminished signal-to-noise and surface heating.  
638 Although SiC is transparent for wavelengths  $> 0.5 \mu\text{m}$ , its bandgap of  $\sim 2.8 \text{ eV}$  can result

639 in photon absorption for the commonly used 405 and 488 nm lasers (Pham, 2004). Using  
640 PE-CVD, 10 nm is thinnest layer we could fabricate while still maintaining the layer's  
641 integrity to protect the coverslip from the Buffered Oxide Etch.

- 642 - The layer of SiO<sub>2</sub> of 100 nm ensures that the microtubule can polymerize underneath  
643 the overhang while remaining inside the evanescent wave.
- 644 - The top layer of SiC is 250 nm thick to ensure mechanical stability, while still allowing  
645 to observe microtubules growing on top of the barrier despite some photon absorption.

646

647 To start, glass coverslips (24x24 mm, #1) were cleaned for 10 min with base piranha, a mixture  
648 of H<sub>2</sub>O:NH<sub>4</sub>OH:H<sub>2</sub>O<sub>2</sub> in a 5:1:1 ratio heated to 70°C. Then, three sequential layers of SiC (10  
649 nm), SiO<sub>2</sub> (100 nm), and SiC (250 nm) are deposited on the cleaned surface via Plasma-  
650 Enhanced Chemical Vapour Deposition (PE-CVD) at 300°C (Oxford Instruments PlasmaPro  
651 80). PE-CVD ensures a surface smooth enough for TIRF microscopy with fast deposition rates  
652 (70 nm/min for SiO<sub>2</sub> and 40 nm/min for SiC).

653 In order to transfer the barrier pattern to the surface, UV lithography is used. First, to  
654 aid in the adhesion of the photoresist, a few drops of hexamethyldisilazane (HMDS) are spin  
655 coated on the SiC surface and allowed to dry on a 115°C hotplate for 30 seconds. Then a 1.3  
656 µm layer of the positive photoresist S1813 (MicroChem) is spin coated (5000rpm) on the  
657 surface and pre-baked for 90 seconds on a 115°C hotplate. Exposure of the photoresist through  
658 a chromium mask with a near-UV source (320-365 nm, approx. 13 mW/cm<sup>2</sup>) transfers the  
659 barrier pattern in 4 seconds (EVgroup EVG 620). Development with MF321 (MicroPosit) for  
660 60 seconds removes the UV-exposed regions of the resist.

661 Next, Reactive Ion Etching (Leybold Hereaus) with a mixture of CHF<sub>3</sub>:O<sub>2</sub> (50 sccm:2.5  
662 sccm) etches through the exposed regions of the 250 nm SiC layer and into the SiO<sub>2</sub> layer. The  
663 etch is performed at 50 µbar and at 100 W, resulting in a bias voltage of 400 V. It is important  
664 to etch completely through the top SiC layer, but only partly through the SiO<sub>2</sub> layer, to leave  
665 the bottom SiC layer intact. Any remaining photoresist after the etch is removed by sonication  
666 of the sample in acetone for 10 minutes.

667 Finally, the sample is submerged in buffered hydrofluoric acid (HF:NH<sub>4</sub>F = 12.5:87.5%)  
668 to selectively etch the exposed SiO<sub>2</sub> with a rate of approximately 200 nm/min to obtain an  
669 overhang of 1.5 µm. The final barriers are 100 nm high with an overhang of 1.5 µm, enclosing  
670 channels with a width of 15 µm.

671

672 ***In vitro* microtubule dynamics assay**

673 Reconstitution of microtubule dynamics was performed as previously described in (Bieling et  
674 al., 2007; Montenegro Gouveia et al., 2010). After cleaning the barrier sample with O<sub>2</sub>-plasma,  
675 a flow channel was constructed with a cleaned glass slide and double-sided sticky tape in such  
676 a way that the channel direction is perpendicular to the barriers. Then, the surface was  
677 consecutively functionalized with 0.5 mg/ml PLL-PEG-biotin(20%) (SuSoS AG, Switzerland),  
678 0.2 mg/ml NeutrAvidin (Invitrogen), and 0.5 mg/ml κ-casein (Sigma). All components were  
679 kept in MRB80 buffer, comprised of 80mM piperazine-N,N'-bis(2-ethanesulfonic acid), 4mM  
680 MgCl<sub>2</sub>, and 1mM EGTA at a pH of 6.8. The reaction mixture contained 15 μM tubulin (7%  
681 rhodamine labelled) in the presence of GFP-EB3 or Hilyte488 labelled tubulin in the absence  
682 of GFP-EB3, supplemented with 0.5 mg/ml κ-casein, 0.15% methylcellulose, 50 mM KCl, 1  
683 mM GTP, oxygen scavenger mix (4 mM DTT, 200 μg/ml catalase, 400 μg/ml glucose oxidase,  
684 50mM glucose). The reaction mix is then centrifuged in an Airfuge (Beckman Coulter) at 30psi  
685 for 8 minutes to remove any aggregated complexes before being introduced to the sample.  
686 GMPCPP-stabilized seeds (70% unlabelled tubulin, 18% biotinylated tubulin, 12% rhodamine-  
687 labelled tubulin) were introduced to the channel with the flow direction perpendicular to the  
688 barriers. Flow cells were sealed with vacuum grease and imaged on a TIRF microscope at 28-  
689 30°C.

690

### 691 **TIRF microscopy**

692 All experiments were imaged using TIRF microscopy, consisting of an Ilas<sup>2</sup> system (Roper  
693 Scientific) on a Nikon Ti-E inverted microscope. The Ilas<sup>2</sup> system is a dual illuminator for  
694 azimuthal spinning TIRF illumination equipped with a 150 mW 488 nm laser, a 100 mW 561  
695 nm laser, and a ZT405/488/561/640rpc dichroic mirror. Simultaneous dual-acquisition was  
696 performed with two Evolve 512 EMCCD camera's (Photometrics) through a 525/50 nm and a  
697 609/54 emission filter, using a Nikon CFI Plan Apochromat 100XH NA1.45 TIRF oil objective.  
698 Together with an additional magnifying lens, the final magnification resulted in a pixel size of  
699 107 nm/pixel. The sample was heated with a custom objective heater to 28-30°C and was kept  
700 in focus with the Nikon Perfect Focus system. The hardware was controlled with MetaMorph  
701 7.8.8.0 (Molecular Device).

702

### 703 **Image treatment**

704 The image stacks obtained with TIRF microscopy were corrected prior to data analysis. First,  
705 simultaneous acquisition of rhodamine-labelled tubulin and GFP-EB3 on two cameras  
706 introduced a non-linear spatial offset between the two image stacks due to imperfections in the



707 dichroic mirror and in the alignment of the two cameras. By scanning multiple FOVs of a  
708 calibration slide containing 100 nm TetraSpeck beads (ThermoFisher) and automatically  
709 locating the centroids through a custom written MATLAB script, a non-linear registration  
710 profile accounting for the spatial offset was calculated. The misaligned image stack was  
711 corrected by applying this registration profile based on the position of ~500 bead positions.  
712 Additionally, any sample drift was corrected by subpixel image registration through cross-  
713 correlation (Guizar-Sicairos et al., 2008).

714 Secondly, some scattering of excitation light at the edge of the SiC overhang made  
715 proper determination of the GFP-EB3 signal near the barrier difficult. Although this effect was  
716 mostly mediated by creating a wide undercut that physically separated the edge of the overhang  
717 from the barrier, a correction was nonetheless applied. To correct the signal, the minimum  
718 intensity value of each pixel in the image stack was subtracted from that pixel in each image.  
719 This correction enabled tracking of the EB3 comet near the barrier and accurate measurement  
720 of the EB3 comet intensity.

721 Thirdly, a general background subtraction was performed in Fiji (Schindelin et al., 2012)  
722 to correct for inhomogeneous illumination.

723

## 724 **Image analysis**

725 Analysis of the images was partly performed with Fiji and with MATLAB. After the image  
726 treatment described above, kymographs were created by drawing straight lines of 9-pixel width  
727 (0.95  $\mu\text{m}$ ) along growing microtubules using KymoResliceWide plugin with maximum  
728 transverse intensity (<http://fiji.sc/KymoResliceWide>). Each growth event in the kymographs  
729 was manually traced to determine the position of the microtubule tip. This position was then  
730 used to fit the EB3 comet to obtain its position and intensity, using the intensity profile:

$$731 \quad I(x) = I_A \cdot \exp\left[-\frac{(x-x_c)^2}{\sigma^2}\right] + I_{bkg},$$

732 where  $I(x)$  is the fluorescence intensity,  $I_{bkg}$  is the background intensity,  $I_A$  is the intensity  
733 amplitude,  $x_c$  is the position of the peak of the EB3 comet, and  $\sigma$  is the width of the EB3 comet.  
734 As EB3 comet decay at the barrier makes fitting impossible, the intensity during contact was  
735 determined by calculating the average intensity value in a region around the comet position and



736 around the barrier (Fig. S1C). The barrier contact duration and comet decay duration were  
737 determined manually.

### 738 **Monte Carlo simulations**

739 Simulations of growing microtubules were run as a series of discrete, fixed time-steps. The  
740 length of the time steps  $\delta t$  was chosen small enough to properly account for the random  
741 hydrolysis of the subunits ( $P_{hyd}$ , the probability for a dimer to undergo hydrolysis within one  
742 timestep was kept at  $<0.05$ ). Further restrictions were to not exceed the desired framerate, in  
743 our case the lowest used experimental frame rate of 250 ms. Due to the discrete nature of  
744 microtubule growth in subunits, the next-lowest time-step for which  $\langle V \rangle \delta t / L_0$  became an  
745 integer was chosen, with  $L_0 = \frac{8}{13} nm$  the length increment per subunit and  $\langle V \rangle$  the microtubule  
746 mean growth velocity.

747 Each microtubule simulation started from a few initial subunits (a ‘seed’) that were excluded  
748 from hydrolysis, and that were not allowed to be removed during microtubule tip fluctuations.  
749 Microtubule growth was simulated as a discrete, biased, Gaussian random walk. This means  
750 that for each time-step  $\delta t$ , the microtubule length was changed by a discretized random number  
751 of subunits that was drawn from a Gaussian distribution with standard deviation  $\sigma = \sqrt{2D_{tip}\delta t}$   
752 and centered at  $\langle dx \rangle / L_0$ .

753 During each time step, subunits transition from the GTP/GDP-Pi to the GDP state by random  
754 hydrolysis with a rate  $k_{hyd}$ . Whenever the foremost uninterrupted strand of GDP state subunits  
755 ( $\geq N_{unstable}$  subunits in a row) is changed, the position of the end of the stable cap will jump  
756 to the front element of this strand, which we interpret as the new position of the end of the stable  
757 cap  $L_{end-of-cap}$ .

758 A simulation run ends when a catastrophe occurs. This happens when the stable cap shrinks to  
759 zero, i.e. if  $L_{tip} - L_{end-of-cap} = 0$ , where  $L_{tip}$  is defined as the position of the foremost  
760 subunit of the microtubule. The growth duration was defined as the time from initial growth  
761 until catastrophe. To exclude nucleation kinetics from the simulated lifetimes, a microtubule is  
762 considered to grow after reaching a length of 250 nm.

763 The presence of a physical barrier is modelled by introducing a fixed barrier position  $L_{barrier}$ .  
764 Tip dynamics and random hydrolysis remained unchanged, only the microtubule length was  
765 truncated whenever it would penetrate the barrier. This means the length of the microtubule

766 was set back to  $L_{barrier}$  if  $L_{tip} > L_{barrier}$ . The barrier contact time was then defined as the  
767 time from the microtubules first contact with the barrier until its catastrophe.

768 The simulation was written in Python 3.6 and run on standard PCs. The code to run the  
769 simulation is available under an open-license on GitHub ([https://github.com/florian-](https://github.com/florian-huber/mtdynamics)  
770 [huber/mtdynamics](https://github.com/florian-huber/mtdynamics)).

771

## 772 **Analytical expression for the size of the stabilizing cap**

773 The length of the stabilizing cap  $L_{cap}$  is defined as the distance between the position of the  
774 microtubule tip and the first occurrence of a sequence of hydrolysed subunits  $N$  equal or greater  
775 than  $N_{unstable}$  (Fig. 3C). The location of this sequence of hydrolysed subunits is determined by  
776 the distribution of GDP dimers in the microtubule lattice. We assume that the GTP/GDP-Pi  
777 distribution at the microtubule tip decays mono-exponentially and depends on the hydrolysis  
778 rate  $k_{hyd}$  and mean growth velocity  $\langle V \rangle$  (Bieling et al., 2007; Duellberg et al., 2016a; Seetapun  
779 et al., 2012). The probability  $p(x)$  of finding a GTP/GDP-Pi subunit at position  $x$  in the lattice  
780 (with the microtubule tip at  $x = 0$ ) corresponds to

$$781 \quad p(x) = e^{-x \frac{k_{hyd}}{\langle V \rangle}} \quad (1a)$$

782 with the probability of finding a GDP subunit at position  $x$  being

$$783 \quad q(x) = 1 - p(x) \quad (1b)$$

784 To find the probability distribution of the position of a sequence of  $N$  sequential hydrolysed  
785 dimers equal or greater than  $N_{unstable}$ , we treat the discrete 1D lattice as a series of independent  
786 Bernoulli trials with probabilities  $p(x)$  and  $q(x)$  for GTP/GDP-Pi or GDP dimers respectively  
787 (Fig. S5A). For a lattice shorter than  $N$ , the probability of finding a sequence of  $N$  GDP is zero  
788 since the sequence is longer than the considered lattice. The probability of finding  $N$  GDP  
789 subunits between the positions  $x = 1$  and  $x = N$  is equal to the product of the probability at  
790 each position  $x$ :

$$791 \quad P_{GDP} = \prod_{x=1}^N q(x) \quad (2a)$$

792 If  $N$  and  $\frac{k_{hyd}}{\langle v \rangle}$  are small, the probability of finding a GDP subunit at the beginning of the  
793 sequence is approximately equal to that at the end, i.e.  $q(x_1) \approx q(x_N)$ . Using this assumption,  
794 equation (2a) can be rewritten as

$$795 \quad P_{GDP} = q(x)^N \quad (2b)$$

796 For a position on the lattice further from the tip, the probability of finding a sequence  
797  $N \geq N_{unstable}$  at position  $x$ , with  $x$  being the first position of the sequence, is equal to

$$798 \quad P_{GDP}(x) = p(x)q(x)^N \quad (3)$$

799 as the dimer directly preceding the sequence needs to be unhydrolyzed to initiate the sequence  
800 (Fig S5A).

801 We can now obtain an expression for the probability of finding this sequence for the first time  
802 at position  $x$ , by considering the probability that no sequence is found at any position closer to  
803 the microtubule tip:

$$804 \quad P(x|N) = 1 - \prod_{i=1}^{x-1} [1 - p(x_i)q(x_i)^N] \quad (4)$$

805 This expression gives the cumulative distribution for finding a sequence of  $N$  GDP subunits at  
806 position  $x$  during steady-state growth. We find that this approximation holds reasonably well  
807 for the entire range of  $N_{unstable}$  we explored using the 1D simulation (Fig. S5B). The  
808 probability of finding this sequence of GDP can be captured by the Gaussian cumulative  
809 distribution function:

$$810 \quad P_{cap}(x) = \frac{1}{2} \left[ 1 + \operatorname{erf} \left( \frac{(x - L_{cap})}{\sqrt{2}\sigma_{cap}} \right) \right] \quad (5)$$

811

812 Through numerical analysis we find that the dependency of  $L_{cap}$  on  $N$  follows a power law  
813 (Fig. 8A) and can be described with

$$814 \quad L_{cap}(N) = \alpha(N^\beta - 1),$$

815 where  $\alpha$  and  $\beta$  are coefficients that depend on the hydrolysis rate and the growth velocity.  
 816 Similarly, we can calculate the dependence of the cap size on the parameters  $k_{hyd}$  and  $\langle V \rangle$  (Fig.  
 817 8BC).

818

### 819 **Analytical expression for the catastrophe probability and microtubule lifetimes**

820 The probability for a microtubule to undergo a catastrophe within time window  $\Delta t$  is defined  
 821 as  $P_{cat}(\Delta t)$  and is equal to the probability of reducing the cap size  $L_{cap}$  to zero during  $\Delta t$ . The  
 822 cap size evolves by two competing stochastic processes: it increases by dimer addition at the  
 823 tip and shrinks by dimer removal from the tip and hydrolysis in the lattice. To obtain an  
 824 analytical expression for the catastrophe probability, we consider a microtubule at steady-state  
 825 growth. In this frame of reference, the end of the cap is on average a constant distance from the  
 826 microtubule tip, as both the microtubule tip and the position of the cap end move with equal  
 827 velocity  $\langle V \rangle$ . Any fluctuations of the cap size during steady-state growth are caused by  
 828 fluctuations of the tip position. However, due to the stochastic nature of hydrolysis, any  
 829 incorporated dimers at the microtubule tip position only affect the position of the cap end after  
 830 a characteristic time delay  $\tau_c$ , which is approximately equal to  $k_{hyd}^{-1}$  (Fig. S5C). In other  
 831 words, the delay gives a measure of the time window during which the fluctuations can affect  
 832  $L_{cap}$ , before the position of the cap is affected by hydrolysis. The catastrophe probability is then  
 833 equal to the probability of tip fluctuations to exceed the position of  $L_{cap}$  during time window  
 834  $\tau_c$ .

835 The growth fluctuations at the microtubule tip can be described by a biased random walk with  
 836 Gaussian distributed steps  $\Delta x$  within  $\Delta t$  (Fig 3B).

$$837 \quad P_{tip}(\Delta x, \Delta t) = \frac{1}{\sqrt{4\pi D_{tip} \Delta t}} \exp\left(-\frac{(\Delta x - \langle V \rangle \Delta t)^2}{4D_{tip} \Delta t}\right) \quad (6)$$

838 Note that in the frame of reference of steady-state growth,  $\langle V \rangle = 0$ . To find  $P_{cat}(\Delta t)$ , we  
 839 calculate the probability that the microtubule tip exceeds  $L_{cap}$  during  $\Delta t \leq \tau_c$ . The survival  
 840 probability, the probability that the microtubule tip does not exceed  $L_{cap}$  for all times up to  $\tau_c$ ,  
 841 is defined as

$$842 \quad S(x_c | \tau_c) \equiv \text{erf}\left(\frac{x_c - x_0}{\sqrt{4 D_{tip} \tau_c}}\right) \quad (7a)$$

843 with  $x_c$  being the critical cap-end position. Since the critical cap-end position is defined with  
844 respect to  $x_0$  being the moving tip, we can set  $x_0 = 0$  and get the probability for the tip to have  
845 reached  $x \geq x_c$ :

$$846 \quad P_{tip}(x \geq x_c | \tau_c) = 1 - S(x_c | \tau_c) = 1 - \operatorname{erf}\left(\frac{x_c}{\sqrt{4 D_{tip} \tau_c}}\right) \quad (7b)$$

847 When we set  $x_c = L_{cap}$ , we can calculate the catastrophe probability  $P_{cat}(\tau_c)$  as the probability  
848 of the tip fluctuations exceeding the cap size  $L_{cap}$  during time window  $\tau_c$  with

$$849 \quad P_{cat}(\tau_c) = P_{tip}(x \geq L_{cap} | \tau_c) = 1 - \operatorname{erf}\left(\frac{L_{cap}}{\sqrt{4 D_{tip} \tau_c}}\right) \quad (8)$$

850 The microtubule lifetime distribution  $T_{cat}(t)$  can then be obtained by calculating the fraction  
851 of microtubules that underwent a catastrophe after each timestep  $\tau_c$  (Fig. 7A and S5D):

$$852 \quad T_{cat}(t) = 1 - (1 - P_{cat}(\tau_c))^{\frac{t}{\tau_c}} \quad (9)$$

853 Note that the steady-state approximation becomes less accurate for large  $\frac{k_{hyd}}{\langle V \rangle}$  as steady-state  
854 growth might not be reached in the first place. This leads to a lack of short events and  
855 consequently to an overestimation of the microtubule lifetimes.

## 856 **Author contributions**

857 M.K. designed and fabricated the micro-fabricated barriers, performed experiments with EB  
858 and analysed the data, developed the analytical solution, and ran simulations. F.H. developed  
859 the 1D microtubule model, wrote the simulation code and ran and analysed the simulations.  
860 SM.K. performed and analysed the experiments with Mal3. M.K, F.H., and M.D. wrote the  
861 paper. M.D. coordinated the project.

## 862 **Acknowledgements**

863 We thank M.O. Steinmetz for the gift of GFP-EB3 and the technicians of the van Leeuwenhoek  
864 Laboratory for their technical assistance in the fabrication of the barriers. We thank Vladimir  
865 Volkov and Louis Reese for discussions and critical reading of the manuscript and Seungkyu  
866 Ha for his assistance in acquiring the SEM images. This work was supported by the European  
867 Research Council Synergy grant 6098822 to Marileen Dogterom.

868 **Competing financial interests**

869 The authors declare no competing financial interests.



870 **REFERENCES**

871

872 Aher, A., M. Kok, A. Sharma, A. Rai, N. Olieric, R. Rodriguez-Garcia, E.A. Katrukha, T. Weinert, V. Olieric,  
873 L.C. Kapitein, M.O. Steinmetz, M. Dogterom, and A. Akhmanova. 2018. {CLASP} Suppresses  
874 Microtubule Catastrophes through a Single {TOG} Domain. *Dev Cell*. 46:40-58.e48,  
875 <https://dx.doi.org/10.1016/j.devcel.2018.05.032>

876 Akhmanova, A., and M.O. Steinmetz. 2015. Control of microtubule organization and dynamics: two  
877 ends in the limelight. *Nat Rev Mol Cell Biol*. 16:711-726, <https://dx.doi.org/10.1038/nrm4084>

878 Alushin, G.M., G.C. Lander, E.H. Kellogg, R. Zhang, D. Baker, and E. Nogales. 2014. High-resolution  
879 microtubule structures reveal the structural transitions in  $\alpha\beta$ -tubulin upon {GTP} hydrolysis.  
880 *Cell*. 157:1117-1129, <https://dx.doi.org/10.1016/j.cell.2014.03.053>

881 Antal, T., P.L. Krapivsky, S. Redner, M. Mailman, and B. Chakraborty. 2007. Dynamics of an idealized  
882 model of microtubule growth and catastrophe. *Phys Rev E Stat Nonlin Soft Matter Phys*.  
883 76:041907, <https://dx.doi.org/10.1103/PhysRevE.76.041907>

884 Bayley, P., M. Schilstra, and S. Martin. 1989. A lateral cap model of microtubule dynamic instability.  
885 *FEBS Lett*. 259:181-184, [https://dx.doi.org/10.1016/0014-5793\(89\)81523-6](https://dx.doi.org/10.1016/0014-5793(89)81523-6)

886 Bieling, P., L. Laan, H. Schek, E.L. Munteanu, L. Sandblad, M. Dogterom, D. Brunner, and T. Surrey. 2007.  
887 Reconstitution of a microtubule plus-end tracking system in vitro. *Nature*. 450:1100-1105,  
888 <https://dx.doi.org/10.1038/nature06386>

889 Bollinger, J.A., and M.J. Stevens. 2019. Diverse balances of tubulin interactions and shape change drive  
890 and interrupt microtubule depolymerization. *Soft Matter*. 15:8137-8146,  
891 <https://dx.doi.org/10.1039/c9sm01323g>

892 Bouchet, B.P., I. Noordstra, M. van Amersfoort, E.A. Katrukha, Y.C. Ammon, N.D. Ter Hoeve, L.  
893 Hodgson, M. Dogterom, P.W. Derksen, and A. Akhmanova. 2016. Mesenchymal Cell Invasion  
894 Requires Cooperative Regulation of Persistent Microtubule Growth by {SLAIN}2 and {CLASP}1.  
895 *Dev Cell*. 39:708-723, <https://dx.doi.org/10.1016/j.devcel.2016.11.009>

896 Bowne-Anderson, H., M. Zanic, M. Kauer, and J. Howard. 2013. Microtubule dynamic instability: a new  
897 model with coupled {GTP} hydrolysis and multistep catastrophe. *Bioessays*. 35:452-461,  
898 <https://dx.doi.org/10.1002/bies.201200131>

899 Brangwynne, C.P., F.C. MacKintosh, S. Kumar, N.A. Geisse, J. Talbot, L. Mahadevan, K.K. Parker, D.E.  
900 Ingber, and D.A. Weitz. 2006. Microtubules can bear enhanced compressive loads in living cells  
901 because of lateral reinforcement. *J Cell Biol*. 173:733-741,  
902 <https://dx.doi.org/10.1083/jcb.200601060>

- 903 Brangwynne, C.P., F.C. MacKintosh, and D.A. Weitz. 2007. Force fluctuations and polymerization  
904 dynamics of intracellular microtubules. *Proc Natl Acad Sci U S A*. 104:16128-16133,  
905 <https://dx.doi.org/10.1073/pnas.0703094104>
- 906 Brouhard, G.J., and L.M. Rice. 2018. Microtubule dynamics: an interplay of biochemistry and  
907 mechanics. *Nat Rev Mol Cell Biol*. 19:451-463, <https://dx.doi.org/10.1038/s41580-018-0009-y>
- 908 Brun, L., B. Rupp, J.J. Ward, and F. Nedelec. 2009. A theory of microtubule catastrophes and their  
909 regulation. *Proc Natl Acad Sci U S A*. 106:21173-21178,  
910 <https://dx.doi.org/10.1073/pnas.0910774106>
- 911 Caplow, M., and J. Shanks. 1996. Evidence that a single monolayer tubulin-{GTP} cap is both necessary  
912 and sufficient to stabilize microtubules. *Mol Biol Cell*. 7:663-675,  
913 <https://dx.doi.org/10.1091/mbc.7.4.663>
- 914 Carlier, M.F., and D. Pantaloni. 1981. Kinetic analysis of guanosine 5'-triphosphate hydrolysis  
915 associated with tubulin polymerization. *Biochemistry*. 20:1918-1924,  
916 <http://www.ncbi.nlm.nih.gov/pubmed/7225365>
- 917 Carlier, M.F., and D. Pantaloni. 1982. Assembly of microtubule protein: role of guanosine di- and  
918 triphosphate nucleotides. *Biochemistry*. 21:1215-1224,  
919 <https://www.ncbi.nlm.nih.gov/pubmed/7074077>
- 920 Chen, Y.D., and T.L. Hill. 1985. Monte Carlo study of the {GTP} cap in a five-start helix model of a  
921 microtubule. *Proc Natl Acad Sci U S A*. 82:1131-1135,  
922 <https://www.ncbi.nlm.nih.gov/pubmed/3856250>
- 923 Chretien, D., S.D. Fuller, and E. Karsenti. 1995. Structure of growing microtubule ends: two-  
924 dimensional sheets close into tubes at variable rates. *J Cell Biol*. 129:1311-1328,  
925 <https://dx.doi.org/10.1083/jcb.129.5.1311>
- 926 Coletti, C., M.J. Jaroszeski, A. Pallaoro, A.M. Hoff, S. Iannotta, and S.E. Sadow. 2007. Biocompatibility  
927 and wettability of crystalline {S}i{C} and {S}i surfaces. *Conf Proc IEEE Eng Med Biol Soc*.  
928 2007:5850-5853, <https://dx.doi.org/10.1109/IEMBS.2007.4353678>
- 929 Colin, A., P. Singaravelu, M. Thery, L. Blanchoin, and Z. Gueroui. 2018. Actin-Network Architecture  
930 Regulates Microtubule Dynamics. *Curr Biol*, <https://dx.doi.org/10.1016/j.cub.2018.06.028>
- 931 Coombes, C.E., A. Yamamoto, M.R. Kenzie, D.J. Odde, and M.K. Gardner. 2013. Evolving tip structures  
932 can explain age-dependent microtubule catastrophe. *Curr Biol*. 23:1342-1348,  
933 <https://dx.doi.org/10.1016/j.cub.2013.05.059>
- 934 Das, D., D. Das, and R. Padinhateeri. 2014. Force-induced dynamical properties of multiple cytoskeletal  
935 filaments are distinct from that of single filaments. *PLoS One*. 9:e114014,  
936 <https://dx.doi.org/10.1371/journal.pone.0114014>

- 937 Debs, G.E., M. Cha, X. Liu, A.R. Huehn, and C.V. Sindelar. 2020. Dynamic and asymmetric fluctuations  
938 in the microtubule wall captured by high-resolution cryoelectron microscopy. *Proc Natl Acad*  
939 *Sci U S A*. 117:16976-16984, <https://dx.doi.org/10.1073/pnas.2001546117>
- 940 Dhar, S., O. Seitz, M.D. Halls, S. Choi, Y.J. Chabal, and L.C. Feldman. 2009. Chemical properties of  
941 oxidized silicon carbide surfaces upon etching in hydrofluoric acid. *J Am Chem Soc*. 131:16808-  
942 16813, <https://dx.doi.org/10.1021/ja9053465>
- 943 Dogterom, M., and G.H. Koenderink. 2019. Actin-microtubule crosstalk in cell biology. *Nat Rev Mol Cell*  
944 *Biol*. 20:38-54, <https://dx.doi.org/10.1038/s41580-018-0067-1>
- 945 Drechsel, D.N., and M.W. Kirschner. 1994. The minimum GTP cap required to stabilize microtubules.  
946 *Curr Biol*. 4:1053-1061, [https://dx.doi.org/10.1016/s0960-9822\(00\)00243-8](https://dx.doi.org/10.1016/s0960-9822(00)00243-8)
- 947 Duellberg, C., N.I. Cade, D. Holmes, and T. Surrey. 2016a. The size of the {EB} cap determines  
948 instantaneous microtubule stability. *Elife*. 5, <https://dx.doi.org/10.7554/eLife.13470>
- 949 Duellberg, C., N.I. Cade, and T. Surrey. 2016b. Microtubule aging probed by microfluidics-assisted  
950 tubulin washout. *Mol Biol Cell*. 27:3563-3573, <https://dx.doi.org/10.1091/mbc.E16-07-0548>
- 951 Flyvbjerg, H., T.E. Holy, and S. Leibler. 1996. Microtubule dynamics: {C}aps, catastrophes, and coupled  
952 hydrolysis. *Phys Rev E Stat Phys Plasmas Fluids Relat Interdiscip Topics*. 54:5538-5560,  
953 <https://www.ncbi.nlm.nih.gov/pubmed/9965740>
- 954 Gardner, M.K., B.D. Charlebois, I.M. Janosi, J. Howard, A.J. Hunt, and D.J. Odde. 2011a. Rapid  
955 microtubule self-assembly kinetics. *Cell*. 146:582-592,  
956 <https://dx.doi.org/10.1016/j.cell.2011.06.053>
- 957 Gardner, M.K., M. Zanic, C. Gell, V. Bormuth, and J. Howard. 2011b. Depolymerizing kinesins {K}ip3 and  
958 {MCAK} shape cellular microtubule architecture by differential control of catastrophe. *Cell*.  
959 147:1092-1103, <https://dx.doi.org/10.1016/j.cell.2011.10.037>
- 960 Gregoret, I.V., G. Margolin, M.S. Alber, and H.V. Goodson. 2006. Insights into cytoskeletal behavior  
961 from computational modeling of dynamic microtubules in a cell-like environment. *J Cell Sci*.  
962 119:4781-4788, <https://dx.doi.org/10.1242/jcs.03240>
- 963 Guizar-Sicairos, M., S.T. Thurman, and J.R. Fienup. 2008. Efficient subpixel image registration  
964 algorithms. *Opt Lett*. 33:156-158, <https://www.ncbi.nlm.nih.gov/pubmed/18197224>
- 965 Gurel, P.S., A.L. Hatch, and H.N. Higgs. 2014. Connecting the cytoskeleton to the endoplasmic reticulum  
966 and {G}olgi. *Curr Biol*. 24:R660-R672, <https://dx.doi.org/10.1016/j.cub.2014.05.033>
- 967 Janson, M.E., M.E. de Dood, and M. Dogterom. 2003. Dynamic instability of microtubules is regulated  
968 by force. *J Cell Biol*. 161:1029-1034, <https://dx.doi.org/10.1083/jcb.200301147>
- 969 Kalisch, S.M., L. Laan, and M. Dogterom. 2011. Force generation by dynamic microtubules in vitro.  
970 *Methods Mol Biol*. 777:147-165, [https://dx.doi.org/10.1007/978-1-61779-252-6\\_11](https://dx.doi.org/10.1007/978-1-61779-252-6_11)

- 971 Karr, T.L., and D.L. Purich. 1978. Examination of tubulin-nucleotide interactions by protein fluorescence  
972 quenching measurements. *Biochem Biophys Res Commun.* 84:957-961,  
973 <https://www.ncbi.nlm.nih.gov/pubmed/728162>
- 974 Kerssemakers, J.W., E.L. Munteanu, L. Laan, T.L. Noetzel, M.E. Janson, and M. Dogterom. 2006.  
975 Assembly dynamics of microtubules at molecular resolution. *Nature.* 442:709-712,  
976 <https://dx.doi.org/10.1038/nature04928>
- 977 Kim, T., and L.M. Rice. 2019. Long-range, through-lattice coupling improves predictions of microtubule  
978 catastrophe. *Mol Biol Cell.* 30:1451-1462, <https://dx.doi.org/10.1091/mbc.E18-10-0641>
- 979 Komarova, Y.A., I.A. Vorobjev, and G.G. Borisy. 2002. Life cycle of {MT}s: persistent growth in the cell  
980 interior, asymmetric transition frequencies and effects of the cell boundary. *J Cell Sci.*  
981 115:3527-3539, <https://www.ncbi.nlm.nih.gov/pubmed/12154083>
- 982 Laan, L., J. Husson, E.L. Munteanu, J.W. Kerssemakers, and M. Dogterom. 2008. Force-generation and  
983 dynamic instability of microtubule bundles. *Proc Natl Acad Sci U S A.* 105:8920-8925,  
984 <https://dx.doi.org/10.1073/pnas.0710311105>
- 985 Lee, C.T., and E.M. Terentjev. 2019. Structural effects of cap, crack, and intrinsic curvature on the  
986 microtubule catastrophe kinetics. *J Chem Phys.* 151:135101,  
987 <https://dx.doi.org/10.1063/1.5122304>
- 988 Letort, G., F. Nedelec, L. Blanchoin, and M. Thery. 2016. Centrosome centering and decentering by  
989 microtubule network rearrangement. *Mol Biol Cell.* 27:2833-2843,  
990 <https://dx.doi.org/10.1091/mbc.E16-06-0395>
- 991 Margolin, G., I.V. Gregoret, T.M. Cickovski, C. Li, W. Shi, M.S. Alber, and H.V. Goodson. 2012. The  
992 mechanisms of microtubule catastrophe and rescue: implications from analysis of a dimer-  
993 scale computational model. *Mol Biol Cell.* 23:642-656, <https://dx.doi.org/10.1091/mbc.E11-08-0688>
- 994
- 995 Margolin, G., I.V. Gregoret, H.V. Goodson, and M.S. Alber. 2006. Analysis of a mesoscopic stochastic  
996 model of microtubule dynamic instability. *Phys Rev E Stat Nonlin Soft Matter Phys.* 74:041920,  
997 <https://dx.doi.org/10.1103/PhysRevE.74.041920>
- 998 Maurer, S.P., P. Bieling, J. Cope, A. Hoenger, and T. Surrey. 2011. {GTP} $\gamma$ {S} microtubules mimic the  
999 growing microtubule end structure recognized by end-binding proteins ({EB}s). *Proc Natl Acad*  
1000 *Sci U S A.* 108:3988-3993, <https://dx.doi.org/10.1073/pnas.1014758108>
- 1001 Maurer, S.P., N.I. Cade, G. Bohner, N. Gustafsson, E. Boutant, and T. Surrey. 2014. {EB}1 accelerates  
1002 two conformational transitions important for microtubule maturation and dynamics. *Curr Biol.*  
1003 24:372-384, <https://dx.doi.org/10.1016/j.cub.2013.12.042>

- 1004 Maurer, S.P., F.J. Fourniol, G. Bohner, C.A. Moores, and T. Surrey. 2012. {EB}s recognize a nucleotide-  
1005 dependent structural cap at growing microtubule ends. *Cell*. 149:371-382,  
1006 <https://dx.doi.org/10.1016/j.cell.2012.02.049>
- 1007 McIntosh, J.R., E. O'Toole, G. Morgan, J. Austin, E. Ulyanov, F. Ataullakhanov, and N. Gudimchuk. 2018.  
1008 Microtubules grow by the addition of bent guanosine triphosphate tubulin to the tips of curved  
1009 protofilaments. *J Cell Biol*, <https://dx.doi.org/10.1083/jcb.201802138>
- 1010 Meadows, J.C., L.J. Messin, A. Kamnev, T.C. Lancaster, M.K. Balasubramanian, R.A. Cross, and J.B.  
1011 Millar. 2018. Opposing kinesin complexes queue at plus tips to ensure microtubule  
1012 catastrophe at cell ends. *EMBO Rep*. 19, <https://dx.doi.org/10.15252/embr.201846196>
- 1013 Michaels, T.C., S. Feng, H. Liang, and L. Mahadevan. 2020. Mechanics and kinetics of dynamic  
1014 instability. *Elife*. 9, <https://dx.doi.org/10.7554/eLife.54077>
- 1015 Mitchison, T., and M. Kirschner. 1984. Dynamic instability of microtubule growth. *Nature*. 312:237-  
1016 242, <http://www.ncbi.nlm.nih.gov/pubmed/6504138>
- 1017 Mohan, R., E.A. Katrukha, H. Doodhi, I. Smal, E. Meijering, L.C. Kapitein, M.O. Steinmetz, and A.  
1018 Akhmanova. 2013. End-binding proteins sensitize microtubules to the action of microtubule-  
1019 targeting agents. *Proc Natl Acad Sci U S A*. 110:8900-8905,  
1020 <https://dx.doi.org/10.1073/pnas.1300395110>
- 1021 Molodtsov, M.I., E.A. Ermakova, E.E. Shnol, E.L. Grishchuk, J.R. McIntosh, and F.I. Ataullakhanov. 2005.  
1022 A molecular-mechanical model of the microtubule. *Biophys J*. 88:3167-3179,  
1023 <https://dx.doi.org/10.1529/biophysj.104.051789>
- 1024 Montenegro Gouveia, S., K. Leslie, L.C. Kapitein, R.M. Buey, I. Grigoriev, M. Wagenbach, I. Smal, E.  
1025 Meijering, C.C. Hoogenraad, L. Wordeman, M.O. Steinmetz, and A. Akhmanova. 2010. In vitro  
1026 reconstitution of the functional interplay between {MCAK} and {EB}3 at microtubule plus ends.  
1027 *Curr Biol*. 20:1717-1722, <https://dx.doi.org/10.1016/j.cub.2010.08.020>
- 1028 Nguyen-Ngoc, T., K. Afshar, and P. Gonczy. 2007. Coupling of cortical dynein and {G}α proteins  
1029 mediates spindle positioning in {C}aenorhabditis elegans. *Nat Cell Biol*. 9:1294-1302,  
1030 <https://dx.doi.org/10.1038/ncb1649>
- 1031 Nogales, E. 1999. A structural view of microtubule dynamics. *Cell Mol Life Sci*. 56:133-142,  
1032 <http://www.ncbi.nlm.nih.gov/pubmed/11213253>
- 1033 Odde, D.J., L. Cassimeris, and H.M. Buettner. 1995. Kinetics of microtubule catastrophe assessed by  
1034 probabilistic analysis. *Biophys J*. 69:796-802, [https://dx.doi.org/10.1016/S0006-  
1035 3495\(95\)79953-2](https://dx.doi.org/10.1016/S0006-3495(95)79953-2)
- 1036 Odde, D.J., L. Ma, A.H. Briggs, A. DeMarco, and M.W. Kirschner. 1999. Microtubule bending and  
1037 breaking in living fibroblast cells. *J Cell Sci*. 112 ( Pt 19):3283-3288,  
1038 <https://www.ncbi.nlm.nih.gov/pubmed/10504333>

- 1039 Ohi, R., and M. Zanic. 2016. Ahead of the Curve: New Insights into Microtubule Dynamics. *F1000Res*.  
1040 5, <https://dx.doi.org/10.12688/f1000research.7439.1>
- 1041 Padinhateeri, R., A.B. Kolomeisky, and D. Lacoste. 2012. Random hydrolysis controls the dynamic  
1042 instability of microtubules. *Biophys J*. 102:1274-1283,  
1043 <https://dx.doi.org/10.1016/j.bpj.2011.12.059>
- 1044 Pallavicini, C., A. Monastra, N.G. Bardeci, D. Wetzler, V. Levi, and L. Bruno. 2017. Characterization of  
1045 microtubule buckling in living cells. *Eur Biophys J*, [https://dx.doi.org/10.1007/s00249-017-](https://dx.doi.org/10.1007/s00249-017-1207-9)  
1046 [1207-9](https://dx.doi.org/10.1007/s00249-017-1207-9)
- 1047 Pham, H.T.M. 2004. {PE}-{CVD} {S}ilicon {C}arbide - a structured material for surface micromachined  
1048 devices. *Doctoral Thesis*, <https://dx.doi.org/uuid:91e396a8-5857-4e93-ba27-8a82d0d9f2b7>
- 1049 Piedra, F.A., T. Kim, E.S. Garza, E.A. Geyer, A. Burns, X. Ye, and L.M. Rice. 2016. {GDP}-to-{GTP}  
1050 exchange on the microtubule end can contribute to the frequency of catastrophe. *Mol Biol*  
1051 *Cell*. 27:3515-3525, <https://dx.doi.org/10.1091/mbc.E16-03-0199>
- 1052 Preciado Lopez, M., F. Huber, I. Grigoriev, M.O. Steinmetz, A. Akhmanova, G.H. Koenderink, and M.  
1053 Dogterom. 2014. Actin-microtubule coordination at growing microtubule ends. *Nat Commun*.  
1054 5:4778, <https://dx.doi.org/10.1038/ncomms5778>
- 1055 Rickman, J., C. Duellberg, N.I. Cade, L.D. Griffin, and T. Surrey. 2017. Steady-state {EB} cap size  
1056 fluctuations are determined by stochastic microtubule growth and maturation. *Proc Natl Acad*  
1057 *Sci U S A*. 114:3427-3432, <https://dx.doi.org/10.1073/pnas.1620274114>
- 1058 Roth, D., B.P. Fitton, N.P. Chmel, N. Wasiluk, and A. Straube. 2018. Spatial positioning of {EB} family  
1059 proteins at microtubule tips involves distinct nucleotide-dependent binding properties. *J Cell*  
1060 *Sci*. 132, <https://dx.doi.org/10.1242/jcs.219550>
- 1061 Schek, H.T., 3rd, M.K. Gardner, J. Cheng, D.J. Odde, and A.J. Hunt. 2007. Microtubule assembly  
1062 dynamics at the nanoscale. *Curr Biol*. 17:1445-1455,  
1063 <https://dx.doi.org/10.1016/j.cub.2007.07.011>
- 1064 Schindelin, J., I. Arganda-Carreras, E. Frise, V. Kaynig, M. Longair, T. Pietzsch, S. Preibisch, C. Rueden,  
1065 S. Saalfeld, B. Schmid, J.Y. Tinevez, D.J. White, V. Hartenstein, K. Eliceiri, P. Tomancak, and A.  
1066 Cardona. 2012. Fiji: an open-source platform for biological-image analysis. *Nat Methods*.  
1067 9:676-682, <https://dx.doi.org/10.1038/nmeth.2019>
- 1068 Seetapun, D., B.T. Castle, A.J. McIntyre, P.T. Tran, and D.J. Odde. 2012. Estimating the microtubule  
1069 {GTP} cap size in vivo. *Curr Biol*. 22:1681-1687, <https://dx.doi.org/10.1016/j.cub.2012.06.068>
- 1070 Sirajuddin, M., L.M. Rice, and R.D. Vale. 2014. Regulation of microtubule motors by tubulin isotypes  
1071 and post-translational modifications. *Nat Cell Biol*. 16:335-344,  
1072 <https://dx.doi.org/10.1038/ncb2920>



- 1073 Taberner, N., G. Weber, C. You, R. Dries, J. Piehler, and M. Dogterom. 2014. Reconstituting functional  
1074 microtubule-barrier interactions. *Methods Cell Biol.* 120:69-90,  
1075 <https://dx.doi.org/10.1016/B978-0-12-417136-7.00005-7>
- 1076 Tilney, L.G., J. Bryan, D.J. Bush, K. Fujiwara, M.S. Mooseker, D.B. Murphy, and D.H. Snyder. 1973.  
1077 Microtubules: evidence for 13 protofilaments. *J Cell Biol.* 59:267-275,  
1078 <https://dx.doi.org/10.1083/jcb.59.2.267>
- 1079 Tischer, C., D. Brunner, and M. Dogterom. 2009. Force- and kinesin-8-dependent effects in the spatial  
1080 regulation of fission yeast microtubule dynamics. *Mol Syst Biol.* 5:250,  
1081 <https://dx.doi.org/10.1038/msb.2009.5>
- 1082 Valiyakath, J., and M. Gopalakrishnan. 2018. Polymerisation force of a rigid filament bundle: diffusive  
1083 interaction leads to sublinear force-number scaling. *Sci Rep.* 8:2526,  
1084 <https://dx.doi.org/10.1038/s41598-018-20259-7>
- 1085 VanBuren, V., L. Cassimeris, and D.J. Odde. 2005. Mechanochemical model of microtubule structure  
1086 and self-assembly kinetics. *Biophys J.* 89:2911-2926,  
1087 <https://dx.doi.org/10.1529/biophysj.105.060913>
- 1088 VanBuren, V., D.J. Odde, and L. Cassimeris. 2002. Estimates of lateral and longitudinal bond energies  
1089 within the microtubule lattice. *Proc Natl Acad Sci U S A.* 99:6035-6040,  
1090 <https://dx.doi.org/10.1073/pnas.092504999>
- 1091 Vleugel, M., M. Kok, and M. Dogterom. 2016. Understanding force-generating microtubule systems  
1092 through in vitro reconstitution. *Cell Adh Migr:*475-494,  
1093 <https://dx.doi.org/10.1080/19336918.2016.1241923>
- 1094 von Loeffelholz, O., N.A. Venables, D.R. Drummond, M. Katsuki, R. Cross, and C.A. Moores. 2017.  
1095 Nucleotide- and  $\{M\}a13$ -dependent changes in fission yeast microtubules suggest a structural  
1096 plasticity view of dynamics. *Nat Commun.* 8:2110, [https://dx.doi.org/10.1038/s41467-017-](https://dx.doi.org/10.1038/s41467-017-02241-5)  
1097 [02241-5](https://dx.doi.org/10.1038/s41467-017-02241-5)
- 1098 Walker, R.A., N.K. Pryer, and E.D. Salmon. 1991. Dilution of individual microtubules observed in real  
1099 time in vitro: evidence that cap size is small and independent of elongation rate. *J Cell Biol.*  
1100 114:73-81, <https://dx.doi.org/10.1083/jcb.114.1.73>
- 1101 Waterman-Storer, C.M., J. Gregory, S.F. Parsons, and E.D. Salmon. 1995. Membrane/microtubule tip  
1102 attachment complexes ( $\{TAC\}$ s) allow the assembly dynamics of plus ends to push and pull  
1103 membranes into tubulovesicular networks in interphase  $\{X\}$ enopus egg extracts. *J Cell Biol.*  
1104 130:1161-1169, <https://dx.doi.org/10.1083/jcb.130.5.1161>
- 1105 Zakharov, P., N. Gudimchuk, V. Voevodin, A. Tikhonravov, F.I. Ataulakhanov, and E.L. Grishchuk. 2015.  
1106 Molecular and Mechanical Causes of Microtubule Catastrophe and Aging. *Biophys J.* 109:2574-  
1107 2591, <https://dx.doi.org/10.1016/j.bpj.2015.10.048>

1108 Zhang, R., G.M. Alushin, A. Brown, and E. Nogales. 2015. Mechanistic Origin of Microtubule Dynamic  
1109 Instability and Its Modulation by {EB} Proteins. *Cell*. 162:849-859,  
1110 <https://dx.doi.org/10.1016/j.cell.2015.07.012>

1111
